# Supplementary material
Source: PubMed Central journal article supplement (PMC539166)
Supplement: mbc_E04-07-0560_1.pdf [file mbc_E04-07-0560_1.pdf]

## Supplementary Table 1

### *Mutants affected in carbon/nitrogen signalling/amino acid metabolism*

| Locus                                     | Common name  | Glutathione excretion (fold parent) | Capacity for respiratory growth | DTT tolerance <sup>a</sup> 48 h; 72 h | Function                                     |
|-------------------------------------------|--------------|-------------------------------------|---------------------------------|---------------------------------------|----------------------------------------------|
| Carbon signaling; RAS/cAMP/PKA pathway    |              |                                     |                                 |                                       |                                              |
| <u><i>vol081w</i></u>                     | <i>ira2</i>  | 25                                  | yes                             | 1; 1                                  | GTPase-acting protein for Ras1p & Ras2p      |
| <i>yor360c</i>                            | <i>pde2</i>  | 22                                  | yes                             | 4; 4                                  | High-affinity phosphodiesterase              |
| Nitrogen signaling; amino acid metabolism |              |                                     |                                 |                                       |                                              |
| <i>ydr300c</i>                            | <i>pro1</i>  | 18                                  | yes                             | 1; 3                                  | Proline biosynthesis pathway                 |
| <i>yel062w</i>                            | <i>npr2</i>  | 6                                   | yes                             | 2; 3                                  | Nitrogen permease regulator                  |
| <i>ygl227w</i>                            | <i>vid30</i> | 3                                   | yes                             | 2; 3                                  | Nitrogen metabolism; gene expression         |
| <u><i>ynl229c</i></u>                     | <i>ure2</i>  | 24                                  | yes                             | 2; 3                                  | Regulator nitrogen catabolite repression     |
| <i>yor375c</i>                            | <i>gdh1</i>  | 5                                   | yes                             | 4; 4                                  | Glutamate dehydrogenase (NADP <sup>+</sup> ) |

Glutathione was measured in stationary phase and is expressed as fold relative to the parent. Respiratory capacity was determined by checking growth on YPG medium. Underlined loci denote mutants showing a reduced capacity/inability to utilise 1 mM GSH as a sole nitrogen source. <sup>a</sup>Tolerance to DTT determined after 48 h and 72 h: 1 = no detectable growth; 2 = very poor growth; 3 = poor growth; 4 = minor or no effect relative to the parental strain.

## Supplementary Table 2

### *Mutants affected in mitochondrial function*

| Locus                                                      | Common name   | Glutathione excretion (fold parent) | Capacity for respiratory growth | DTT tolerance <sup>a</sup> 48 h; 72 h | Function                                                  |
|------------------------------------------------------------|---------------|-------------------------------------|---------------------------------|---------------------------------------|-----------------------------------------------------------|
| Mitochondrial respiratory complexes: subunits and assembly |               |                                     |                                 |                                       |                                                           |
| <i>ybr003w</i>                                             | <i>coq1</i>   | 12                                  | no                              | 4; 4                                  | Coenzyme Q biosynthesis                                   |
| <i>ybr037c</i>                                             | <i>sco1</i>   | 10                                  | no                              | 4; 4                                  | Cu <sup>2+</sup> insertion into cytochrome c oxidase      |
| <i>ydr079w</i>                                             | <i>pet100</i> | 11                                  | no                              | 4; 4                                  | Assembly of cytochrome c oxidase                          |
| <i>ydr204w</i>                                             | <i>coq4</i>   | 9                                   | no                              | 4; 4                                  | Coenzyme Q biosynthesis                                   |
| <i>ydr298c</i>                                             | <i>atp5</i>   | 10                                  | no                              | 4; 4                                  | Subunit of F <sub>1</sub> F <sub>0</sub> -ATPase          |
| <i>ydr529c</i>                                             | <i>qcr7</i>   | 10                                  | no                              | 4; 4                                  | Cytochrome c reductase subunit VII                        |
| <i>yer141w</i>                                             | <i>cox15</i>  | 11                                  | no                              | 4; 4                                  | Heme A biosynthesis; Cox assembly                         |
| <i>yer154w</i>                                             | <i>oxal</i>   | 11                                  | no                              | 4; 4                                  | Assembly of F <sub>1</sub> F <sub>0</sub> -ATPase and Cox |
| <i>ygr062c</i>                                             | <i>cox18</i>  | 6                                   | no                              | 4; 4                                  | Activity of cytochrome c oxidase                          |
| <i>yhr051w</i>                                             | <i>cox6</i>   | 7                                   | no                              | 4; 4                                  | Cytochrome c oxidase subunit VI                           |
| <i>yil098c</i>                                             | <i>fmc1</i>   | 14                                  | yes                             | 4; 4                                  | Cytochrome assembly                                       |
| <i>yjl166w</i>                                             | <i>qcr8</i>   | 8                                   | no                              | 4; 4                                  | Cytochrome c reductase subunit VIII                       |
| <i>yll009c</i>                                             | <i>cox17</i>  | 2                                   | no                              | 4; 4                                  | Cu <sup>2+</sup> insertion into cytochrome c oxidase      |
| <i>yll018c-a</i>                                           | <i>cox19</i>  | 10                                  | no                              | 4; 4                                  | Cytochrome c oxidase activity                             |
| <i>ypl132w</i>                                             | <i>cox11</i>  | 8                                   | no                              | 4; 4                                  | Heme A biosynthesis                                       |
| <i>ypr004c</i>                                             |               | 25                                  | yes                             | 4; 4                                  | Electron transfer flavoprotein                            |
| <i>ypr191w</i>                                             | <i>qcr2</i>   | 7                                   | no                              | 4; 4                                  | Cytochrome c reductase subunit II                         |
| Mitochondrial genome integrity and expression              |               |                                     |                                 |                                       |                                                           |
| <i>ybr268w</i>                                             | <i>mrpl37</i> |                                     | no                              | 4; 4                                  | Mitochondrial ribosomal protein                           |
| <i>ycr046c</i>                                             | <i>img1</i>   | 8                                   | poor                            | 4; 4                                  | Putative mitochondrial ribosomal protein                  |
| <i>ydl069c</i>                                             | <i>cbs1</i>   | 10                                  | no                              | 4; 4                                  | Translational activator of COB mRNA                       |
| <i>ydl107w</i>                                             | <i>mss2</i>   | 8                                   | no                              | 4; 4                                  | Mitochondrial expression of <i>COX2</i>                   |
| <i>ydl202w</i>                                             | <i>mrpl11</i> |                                     | no                              | 4; 4                                  | Mitochondrial ribosomal protein                           |
| <i>ydr175c</i>                                             | <i>rsm24</i>  | 9                                   | no                              | 3; 3                                  | Mitochondrial ribosomal protein                           |
| <i>ydr197w</i>                                             | <i>cbs2</i>   | 10                                  | no                              | 4; 4                                  | Mitochondrial translational COB mRNA                      |
| <i>ydr322w</i>                                             | <i>mrpl35</i> | 10                                  | no                              | 4; 4                                  | Mitochondrial ribosomal protein                           |
| <i>ydr337w</i>                                             | <i>mrps28</i> | 2                                   | no                              | 4; 4                                  | Mitochondrial ribosomal protein                           |
| <i>ydr462w</i>                                             | <i>mrpl28</i> | 11                                  | no                              | 4; 4                                  | Mitochondrial ribosomal protein                           |
| <i>yer153c</i>                                             | <i>pet122</i> | 9                                   | no                              | 2; 3                                  | Translational activator <i>COX3</i> mRNA                  |
| <i>ygr171c</i>                                             | <i>msm1</i>   | 11                                  | no                              | 4; 4                                  | Methionyl t-RNA synthetase                                |
| <i>yhl038c</i>                                             | <i>cbp2</i>   | 4                                   | no                              | 1; 3                                  | COB aI5 intron splicing                                   |
| <i>yhr011w</i>                                             | <i>dia4</i>   | 15                                  | no                              | 4; 4                                  | Amino acyl-tRNA synthetase                                |
| <i>yhr116w</i>                                             |               | 8                                   | no                              | 4; 4                                  | Putative mitochondrial translation                        |
| <i>yhr120w</i>                                             | <i>msh1</i>   | 11                                  | no                              | 4; 4                                  | Mitochondrial DNA repair                                  |
| <i>yhr147c</i>                                             | <i>mrpl6</i>  | 11                                  | no                              | 4; 4                                  | Mitochondrial ribosomal protein                           |
| <i>yil093c</i>                                             | <i>rsm25</i>  | 7                                   | no                              | 4; 4                                  | Mitochondrial ribosomal protein                           |
| <i>yir021w</i>                                             | <i>mrs1</i>   | 9                                   | no                              | 4; 4                                  | COB mRNA splicing                                         |
| <i>yjl063c</i>                                             | <i>mrpl8</i>  | 6                                   | no                              | 1; 1                                  | Mitochondrial ribosomal protein                           |
| <i>yjl102w</i>                                             | <i>mef2</i>   | 8                                   | no                              | 4; 4                                  | Putative mitochondrial translation                        |
| <i>yjl209w</i>                                             | <i>cbp1</i>   | 8                                   | no                              | 4; 4                                  | COB mRNA stability & 5' processing                        |
| <i>yjr144w</i>                                             | <i>mgm101</i> | 11                                  | no                              | 4; 4                                  | Mitochondrial genome protein                              |

|                      |               |                 |      |      |                                          |
|----------------------|---------------|-----------------|------|------|------------------------------------------|
| <i>ykl003c</i>       | <i>mrp17</i>  | 29 <sup>b</sup> | no   | 1; 2 | Mitochondrial ribosomal protein          |
| <i>ykr006c</i>       | <i>mrpl13</i> | 8               | no   | 4; 4 | Mitochondrial ribosomal protein          |
| <i>ylr067c</i>       | <i>pet309</i> | 2               | no   | 2; 3 | Stability & translation of <i>COX1</i>   |
| <i>ylr439w</i>       | <i>mrpl4</i>  | 10              | no   | 4; 4 | Mitochondrial ribosomal protein          |
| <i>ymr064w</i>       | <i>aep1</i>   | 11              | no   | 4; 4 | <i>ATP9/OL11</i> transcript accumulation |
| <i>ymr072w</i>       | <i>abf2</i>   | 10              | no   | 4; 4 | Transmission & recombination mtDNA       |
| <i>ymr193w</i>       | <i>mrpl24</i> | 12              | no   | 4; 4 | Mitochondrial ribosomal protein          |
| <i>ymr228w</i>       | <i>mtf1</i>   | 8               | no   | 4; 4 | mtRNA polymerase specificity factor      |
| <i>ynl177c</i>       |               | 8               | no   | 1; 2 | Putative mitochondrial translation       |
| <i>ynr036c</i>       |               | 11              | no   | 4; 4 | Putative mitochondrial ribosomal protein |
| <i>ynr037c</i>       | <i>rsm19</i>  | 4               | no   | 4; 4 | Putative mitochondrial ribosomal protein |
| <i>ynr045w</i>       | <i>pet494</i> | 10              | no   | 1; 3 | Translation of <i>COX3</i> mRNA          |
| <i>yol033w</i>       | <i>mse1</i>   | 9               | no   | 4; 4 | Mitochondrial Glutamyl t-RNA synthetase  |
| <i>yol095c</i>       | <i>hmi1</i>   | 10              | no   | 4; 4 | Mitochondrial DNA helicase               |
| <i>ypl183w-a</i>     |               | 12              | no   | 4; 4 | Putative mitochondrial ribosomal protein |
| <i>ypr166c</i>       | <i>mrp2</i>   | 8               | no   | 4; 4 | Mitochondrial ribosomal protein          |
| Mitochondrial: other |               |                 |      |      |                                          |
| <i>ybr163w</i>       | <i>dem1</i>   | 10              | no   | 4; 4 | Putative mt morphology and respiration   |
| <i>ygl237c</i>       | <i>hap2</i>   | 3               | no   | 4; 4 | Component Hap2,3,4,5p complex            |
| <i>ygr257c</i>       |               | 14              | poor | 4; 4 | Mitochondrial carrier family (MCF)       |
| <i>yil006w</i>       |               | 6               | yes  | 4; 4 | Mitochondrial carrier family (MCF)       |
| <i>yil065c</i>       | <i>fis1</i>   | 10              | yes  | 4; 4 | Involved in mitochondrial division       |
| <i>yil070c</i>       | <i>mam33</i>  | 11              | yes  | 4; 4 | Required for normal respiratory growth   |
| <i>ylr139c</i>       | <i>sls1</i>   | 4               | yes  | 4; 4 | Mitochondrial metabolism                 |
| <i>ylr369w</i>       | <i>ssq1</i>   | 4               | no   | 4; 4 | Mitochondria heat shock protein 70       |
| <i>ymr150c</i>       | <i>impl1</i>  | 8               | no   | 4; 4 | Mitochondrial inner membrane protein     |
| <i>yol009c</i>       | <i>mdm12</i>  | 2               | no   | 4; 4 | Mitochondrial inheritance protein        |

Glutathione was measured in stationary phase and is expressed as fold relative to the parent. Respiratory capacity was determined by checking growth on YPG medium. Underlined loci denote mutants showing a reduced capacity/inability to utilise 1 mM GSH as a sole nitrogen source. <sup>a</sup>Tolerance to DTT determined after 48 h and 72 h: 1 = no detectable growth; 2 = very poor growth; 3 = poor growth; 4 = minor or no effect relative to the parental strain. <sup>b</sup>Since *MRP17* (*YKL003c*; Crick strand) and *VPS2* (*YKL002w*; Watson strand) are in close proximity on opposite DNA strands, deletion of *MRP17* may have disrupted *VPS2* expression.

### Supplementary Table 3

#### *Mutants affected in secretory pathway function/vacuolar protein sorting*

| Locus                                                        | Common name       | Glutathione excretion (fold parent) | Capacity for respiratory growth | DTT tolerance <sup>a</sup> 48 h; 72 h | Function                                                      |
|--------------------------------------------------------------|-------------------|-------------------------------------|---------------------------------|---------------------------------------|---------------------------------------------------------------|
| Class E vacuolar protein sorting/late endosome (LE) function |                   |                                     |                                 |                                       |                                                               |
| <i>ynr006w</i>                                               | <i>vps27</i>      | 34                                  | yes                             | 2; 3                                  | Ub & PI3P binding; upstream ESCRT-I ?                         |
| <i>ycl008c</i>                                               | <i>vps23</i>      | 27                                  | yes                             | 3; 4                                  | ESCRT-I complex                                               |
| <i>ylr119w</i>                                               | <i>vps37/srn2</i> | 25                                  | yes                             | 2; 4                                  | ESCRT-I complex                                               |
| <i>ypl065w</i>                                               | <i>vps28</i>      | 29                                  | ND                              | ND                                    | ESCRT-I complex                                               |
| <i>yir102c</i>                                               | <i>vps25</i>      | 30                                  | poor                            | 1; 3                                  | ESCRT-II complex                                              |
| <i>ylr417w</i>                                               | <i>vps36</i>      | 26                                  | poor                            | 3; 3                                  | ESCRT-II complex                                              |
| <i>ypl002c</i>                                               | <i>vps22/snf8</i> | 35                                  | yes                             | 1; 1                                  | ESCRT-II complex                                              |
| <i>ykl002w</i>                                               | <i>vps2/did4</i>  | 37                                  | no                              | 1; 2                                  | ESCRT-III complex                                             |
| <i>ylr025w</i>                                               | <i>vps32/snf7</i> | 23                                  | yes                             | 1; 2                                  | ESCRT-III complex                                             |
| <i>ymr077c</i>                                               | <i>vps20</i>      | 29                                  | no                              | 1; 3                                  | ESCRT-III complex                                             |
| <i>ykl041w</i>                                               | <i>vps24</i>      | 26                                  | yes                             | 4; 4                                  | ESCRT-III complex                                             |
| <i>ypl084w</i>                                               | <i>vps31/bro1</i> | 20                                  | ND                              | ND                                    | Functions downstream ESCRT-III compl.                         |
| <i>ykr035w-a</i>                                             | <i>did2</i>       | 21                                  | yes                             | 2; 3                                  | Endosomal protein sorting                                     |
| <i>ydr486c</i>                                               | <i>vps60</i>      | 19                                  | yes                             | 4; 4                                  | Endosomal protein sorting                                     |
| <i>ypr173c</i>                                               | <i>vps4</i>       | 12                                  | yes                             | 1; 3                                  | AAA-ATPase, ESCRT complex release                             |
| <i>ydr456w</i>                                               | <i>vps44/nhx1</i> | 6                                   | ND                              | ND                                    | Na <sup>+</sup> /H <sup>+</sup> antiporter Endosomal/vacuolar |
| SNAREs                                                       |                   |                                     |                                 |                                       |                                                               |
| <i>vor036w</i>                                               | <i>vps6/pep12</i> | 21                                  | yes                             | 1; 1                                  | SNARE-Syntaxin of the LE                                      |
| <i>yhl031c</i>                                               | <i>gos1</i>       | 22                                  | yes                             | 4; 4                                  | SNARE-Golgi SNARE 1                                           |
| <i>ygl212w</i>                                               | <i>vam7</i>       | 5                                   | yes                             | 4; 4                                  | SNARE-vacuolar morphogenesis                                  |
| <i>yor106w</i>                                               | <i>vam3</i>       | 6                                   |                                 | 4; 4                                  | SNARE-Assoc. with Vam7 & Complex C                            |
| PI3P Kinases, FYVE domain-containing                         |                   |                                     |                                 |                                       |                                                               |
| <i>ydr323c</i>                                               | <i>pep7/vac1</i>  | 28                                  | poor                            | 1; 1                                  | FYVE domain-containing vac. inherit.                          |
| <i>yfr019w</i>                                               | <i>fab1</i>       | 11                                  | yes                             | 1; 1                                  | FYVE domain-containing PI3(P)5-kinase                         |
| <i>ynr006w</i>                                               | <i>vps27</i>      | 34                                  | yes                             | 2; 3                                  | FYVE domain-containing PI3P binding                           |
| GTP-related                                                  |                   |                                     |                                 |                                       |                                                               |
| <i>ykr001c</i>                                               | <i>vps1</i>       | 8                                   | no                              | 4; 4                                  | GTPase; Golgi-to-LE; sorts Pep12 to LE                        |
| <i>ylr262c</i>                                               | <i>ypt6</i>       | 3                                   | poor                            | 4; 4                                  | GTP-binding LE-to-TGN                                         |
| <i>yml001w</i>                                               | <i>ypt7</i>       | 13                                  | ND                              | ND                                    | GTP-binding LE-to-vacuole                                     |
| <i>yor089c</i>                                               | <i>vps21</i>      | 9                                   | yes                             | 4; 4                                  | Rab GTPase activating/GTP-binding                             |
| <i>yor070c</i>                                               | <i>gyp1</i>       | 4                                   | yes                             | 4; 4                                  | GTPase-activating protein ER-to-Golgi                         |
| <i>ybr131w</i>                                               | <i>ccz1</i>       | 11                                  | ND                              | ND                                    | Vesicular transport, interacts with Ypt7p                     |
| <i>ygl124c</i>                                               | <i>mon1</i>       | 5                                   | yes                             | 4; 4                                  | Complexes with Ccz1p vacuolar delivery                        |
| Vacuolar import and degradation                              |                   |                                     |                                 |                                       |                                                               |
| <i>ybr105c</i>                                               | <i>vid24</i>      | 2                                   | yes                             | 4; 4                                  | Vacuolar import and degradation                               |
| <i>ygl227w</i>                                               | <i>vid30</i>      | 3                                   | poor                            | 4; 4                                  | Vacuolar import and degradation                               |
| <i>yil017c</i>                                               | <i>vid28</i>      | 9                                   | yes                             | 4; 4                                  | Vacuolar import and degradation                               |
| <i>ylr373c</i>                                               | <i>vid22</i>      | 4                                   |                                 | 4; 4                                  | Vacuolar import and degradation                               |
| Class C Complex/vacuolar biogenesis/Ypt7p associated complex |                   |                                     |                                 |                                       |                                                               |
| <i>ylr148w</i>                                               | <i>vps18/pep3</i> | 21                                  | no                              | 1; 1                                  | Class C complex; vac. biogenesis                              |
| <i>ydl077c</i>                                               | <i>vps39/vam6</i> | 5                                   | ND                              | ND                                    | Class C complex; Assoc. with Ypt7p                            |
| <i>ylr396c</i>                                               | <i>vps33</i>      | 14                                  | no                              | 1; 1                                  | Class C complex vac. morphogenesis                            |

|                                  |                   |    |      |      |                                                                   |
|----------------------------------|-------------------|----|------|------|-------------------------------------------------------------------|
| Endosome-to-Golgi retrieval      |                   |    |      |      |                                                                   |
| <i>yhr012w</i>                   | <i>vps29</i>      | 8  | yes  | 4; 4 | Endosome-to-Golgi retrieval                                       |
| <i>yjl053w</i>                   | <i>vps26/pep8</i> | 7  | yes  | 4; 4 | Endosome-to-Golgi retrieval                                       |
| <i>yjl154c</i>                   | <i>vps35</i>      | 19 | yes  | 4; 4 | Endosome-to-Golgi retrieval                                       |
| <i>yor069w</i>                   | <i>vps5</i>       | 8  | yes  | 4; 4 | Endosome-to-Golgi retrieval                                       |
| <i>ypl120w</i>                   | <i>vps30</i>      | 4  | poor | 4; 4 | Endosome-to-Golgi retrieval                                       |
| <i>ylr360w</i>                   | <i>vps38</i>      | 6  | yes  | 4; 4 | Endosome-to-Golgi retrieval                                       |
| <u><i>ydr027c</i></u>            | <i>vps54/luv1</i> | 15 | poor | 1; 4 | Subunit (Sac2p-Vps53p-Luv1p) complex                              |
| <u><i>ydr484w</i></u>            | <i>vps52/sac2</i> | 10 | yes  | 4; 4 | Subunit (Sac2p-Vps53p-Luv1p) complex                              |
| <i>yjl029c</i>                   | <i>vps53</i>      | 13 | ND   | ND   | Subunit (Sac2p-Vps53p-Luv1p) complex                              |
| Vacuolar protein sorting: other  |                   |    |      |      |                                                                   |
| <i>yal002w</i>                   | <i>vps8</i>       | 7  | yes  | 4; 4 | Golgi-to-LE transport                                             |
| <u><i>ydr495c</i></u>            | <i>vps3</i>       | 16 | yes  | 1; 1 | Vacuolar sorting protein and segregation                          |
| <i>yll040c</i>                   | <i>vps13</i>      | 3  | yes  | 4; 4 | Protein involved in vacuolar sorting                              |
| <u><i>yml097c</i></u>            | <i>vps9</i>       | 2  | yes  | 4; 4 | Protein involved in vacuolar sorting                              |
| <i>ymr004w</i>                   | <i>mvp1</i>       | 3  | yes  | 4; 4 | Protein involved in vacuolar sorting                              |
| <i>ynl297c</i>                   | <i>mon2</i>       | 8  | poor | 4; 4 | Protein involved in vacuolar sorting                              |
| <i>yor132w</i>                   | <i>vps17</i>      | 3  | ND   | ND   | Protein involved in vacuolar sorting                              |
| <i>ypl045w</i>                   | <i>vps16</i>      | 2  | no   | 4; 4 | Protein involved in vacuolar sorting                              |
| Golgi-to-ER retrograde transport |                   |    |      |      |                                                                   |
| <i>yer122c</i>                   | <i>glo3</i>       | 6  | no   | 3; 3 | Retrograde transport between Golgi/ER                             |
| Glycosylation                    |                   |    |      |      |                                                                   |
| <i>ygl005c</i>                   | <i>cod5</i>       | 2  | poor | 4; 4 | Component of Sec34p-Sec35p complex                                |
| <u><i>ygl223c</i></u>            | <i>cod3</i>       | 3  | yes  | 4; 4 | Component of Sec34p-Sec35p complex                                |
| <i>yml071c</i>                   | <i>dor1</i>       | 5  | yes  | 4; 4 | Component of Sec34p-Sec35p complex                                |
| <i>ynl041c</i>                   | <i>cod2</i>       | 3  | no   | 4; 4 | Component of Sec34p-Sec35p complex                                |
| <i>ynl051w</i>                   | <i>cod4</i>       | 2  | yes  | 4; 4 | Component of Sec34p-Sec35p complex                                |
| <i>yel036c</i>                   | <i>anp1</i>       | 5  | yes  | 4; 4 | Subunit of mannosyltransferase complex                            |
| <i>yjl183w</i>                   | <i>mmn11</i>      | 3  | yes  | 2; 3 | Subunit of mannosyltransferase complex                            |
| <i>yjr075w</i>                   | <i>hoc1</i>       | 4  |      | 4; 4 | Subunit of mannosyltransferase complex                            |
| <i>ypr159w</i>                   | <i>kre6</i>       | 5  | no   | 4; 4 | Glucan synthase subunit                                           |
| ER/Golgi: other                  |                   |    |      |      |                                                                   |
| <i>ydr518w</i>                   | <i>eug1</i>       | 12 | no   | 4; 4 | Protein disulfide isomerase                                       |
| <i>ygl167c</i>                   | <i>pmr1</i>       | 8  | poor | 1; 3 | Ca <sup>2+</sup> , Mn <sup>2+</sup> -transporting ATPase of Golgi |
| <i>ylr264w</i>                   | <i>sec22</i>      | 7  | yes  | 4; 4 | ER-to-Golgi transp. vesicles (v-SNARE)                            |
| <i>yel031w</i>                   | <i>cod1</i>       | 3  | ND   | ND   | Ca <sup>2+</sup> -ATPase of the ER                                |
| <i>yfl005w</i>                   | <i>sec4</i>       | 2  |      | 4; 4 | Golgi-to-plasma membrane transport                                |
| <i>ygr284c</i>                   | <i>erv29</i>      | 4  | no   | 4; 4 | Component of COPII-coated vesicles                                |
| <u><i>ykl212w</i></u>            | <i>sac1</i>       | 3  | yes  | 1; 3 | PI phosphatase; ATP transport into ER                             |
| Autophagy                        |                   |    |      |      |                                                                   |
| <i>ydl149w</i>                   | <i>apg9</i>       | 2  | poor | 4; 4 | Involved in autophagy pathway                                     |
| <i>yhr171w</i>                   | <i>apg7</i>       | 4  |      | 1; 3 | Involved in autophagy pathway                                     |
| <i>yll042c</i>                   | <i>apg10</i>      | 2  | yes  | 4; 4 | Involved in autophagy pathway                                     |
| <i>ylr423c</i>                   | <i>apg17</i>      | 3  | yes  | 4; 4 | Involved in autophagy pathway                                     |
| <i>ypl149w</i>                   | <i>apg5</i>       | 3  | no   | 4; 4 | Involved in autophagy pathway                                     |

Glutathione was measured in stationary phase and is expressed as fold relative to the parent. Respiratory capacity was determined by checking growth on YPG medium. Underlined loci denote mutants showing a reduced capacity/inability to utilise 1 mM GSH as a sole nitrogen source. <sup>a</sup>Tolerance to DTT determined after 48 h and 72 h: 1 = no detectable growth; 2 = very poor growth; 3 = poor growth; 4 = minor or no effect relative to the parental strain.

### Supplementary Table 4

#### *Mutants affected in mRNA translation*

| Locus          | Common name   | Glutathione excretion (fold parent) | Capacity for respiratory growth | DTT tolerance <sup>a</sup> 48 h; 72 h | Function                                  |
|----------------|---------------|-------------------------------------|---------------------------------|---------------------------------------|-------------------------------------------|
| <u>ybl027w</u> | <u>rpl19b</u> | 4                                   | yes                             | 4; 4                                  | Ribosomal protein L19                     |
| <u>ybl072c</u> | <u>rps8a</u>  | 3                                   | yes                             | 4; 4                                  | Ribosomal protein S8                      |
| <u>ybr191w</u> | <u>rpl21a</u> | 4                                   | yes                             | 4; 4                                  | Ribosomal protein L21                     |
| <u>ydl160c</u> | <u>dhh1</u>   | 3                                   | poor                            | 4; 4                                  | Putative RNA helicase                     |
| <u>ydl191w</u> | <u>rpl35a</u> | 2                                   | yes                             | 4; 4                                  | Ribosomal protein L35                     |
| <u>ydr332w</u> |               | 9                                   | yes                             | 4; 4                                  | RNA helicase                              |
| <u>yhr169w</u> | <u>dbp8</u>   | 5                                   | yes                             | 4; 4                                  | RNA helicase                              |
| <u>yil018w</u> | <u>rpl2b</u>  | 4                                   | yes                             | 4; 4                                  | Ribosomal protein L2                      |
| <u>yjl138c</u> | <u>tif2</u>   | 6                                   | yes                             | 4; 4                                  | Translation initiation factor 4A (eIF4A)  |
| <u>ypl037c</u> | <u>egd1</u>   | 11                                  | no                              | 1; 1                                  | Subunit nascent polypeptide-assoc. compl. |

Glutathione was measured in stationary phase and is expressed as fold relative to the parent. Respiratory capacity was determined by checking growth on YPG medium. Underlined loci denote mutants showing a reduced capacity/inability to utilise 1 mM GSH as a sole nitrogen source. <sup>a</sup>Tolerance to DTT determined after 48 h and 72 h: 1 = no detectable growth; 2 = very poor growth; 3 = poor growth; 4 = minor or no effect relative to the parental strain.

## Supplementary Table 5

### *Mutants affected in ubiquitin/proteasome related processes*

| Locus                 | Common name | Glutathione excretion (fold parent) | Capacity for respiratory growth | DTT tolerance <sup>a</sup> 48 h; 72 h | Function                                  |
|-----------------------|-------------|-------------------------------------|---------------------------------|---------------------------------------|-------------------------------------------|
| <i>ybr173c</i>        | <i>ump1</i> | 10                                  | yes                             | 4; 4                                  | Proteasome maturation and assembly        |
| <i>yel012w</i>        | <i>ubc8</i> | 2                                   | poor                            | 4; 4                                  | Ubiquitin-conjugating enzyme              |
| <u><i>ver151c</i></u> | <i>ubp3</i> | 3                                   | yes                             | 4; 4                                  | Ubiquitin-specific protease               |
| <i>yfr010w</i>        | <i>ubp6</i> | 18                                  | yes                             | 1; 1                                  | Putative ubiquitin-specific protease      |
| <i>yil008w</i>        | <i>urm1</i> | 2                                   | yes                             | 4; 4                                  | Ubiquitin-related protein                 |
| <i>ykl213c</i>        | <i>doa1</i> | 25                                  | yes                             | 1; 1                                  | Protein required in ubiquitin proteolysis |
| <i>ynr051c</i>        | <i>bre5</i> | 9                                   | yes                             | 4; 4                                  | Protein with an RNA recognition motif     |
| <i>yol138c</i>        |             | 7                                   | poor                            | 4; 4                                  | Protein contains WD (WD-40) repeats       |
| <i>ypl074w</i>        | <i>yta6</i> | 11                                  | no                              | 4; 4                                  | Probable component 26S proteasome         |

Glutathione was measured in stationary phase and is expressed as fold relative to the parent. Respiratory capacity was determined by checking growth on YPG medium. Underlined loci denote mutants showing a reduced capacity/inability to utilise 1 mM GSH as a sole nitrogen source. <sup>a</sup>Tolerance to DTT determined after 48 h and 72 h: 1 = no detectable growth; 2 = very poor growth; 3 = poor growth; 4 = minor or no effect relative to the parental strain.

## Supplementary Table 6

### *Mutants affected in cell integrity/cytoskeleton/inositol metabolism*

| Locus                 | Common name  | Glutathione excretion (fold parent) | Capacity for respiratory growth | DTT tolerance <sup>a</sup> 48 h; 72 h | Function                                 |
|-----------------------|--------------|-------------------------------------|---------------------------------|---------------------------------------|------------------------------------------|
| <u><i>yal047c</i></u> | <i>spc72</i> | 5                                   | no                              | 1; 2                                  | Cytoplasmic plaque of spindle pole body  |
| <i>ybl007c</i>        |              | 9                                   | no                              | 4; 4                                  | Assembly of cortical actin cytoskeleton  |
| <u><i>ycl007c</i></u> | <i>cwh36</i> | 7                                   | no                              | 1; 1                                  | Generation of mannoprotein layer         |
| <u><i>yhr030c</i></u> | <i>mpk1</i>  | 5                                   | yes                             | 1; 1                                  | Serine/threonine protein kinase          |
| <i>yhr129c</i>        | <i>arp1</i>  | 3                                   | yes                             | 4; 4                                  | Actin related protein                    |
| <i>yjl042w</i>        | <i>mhp1</i>  | 10                                  | no                              | 1; 1                                  | Microtubule-interacting protein          |
| <u><i>yil095w</i></u> | <i>bck1</i>  | 2                                   | yes                             | 1; 1                                  | Serine/threonine protein kinase          |
| <i>yjl188c</i>        | <i>bud19</i> | 7                                   | yes                             | 4; 4                                  | Possibly involved in bud site selection  |
| <i>yjl201w</i>        | <i>ecm25</i> | 21                                  | yes                             | 4; 4                                  | Possibly involved in cell wall structure |
| <i>ylr006c</i>        | <i>ssk1</i>  | 6                                   | yes                             | 4; 4                                  | Component of MAP kinase pathway          |
| <i>ylr330w</i>        | <i>chs5</i>  | 5                                   | yes                             | 4; 4                                  | Chitin synthase III activity             |
| <u><i>ynl225c</i></u> |              | 2                                   | yes                             | 1; 1                                  | Component of spindle pole body           |
| <i>yor026w</i>        | <i>bub3</i>  | 5                                   | poor                            | 4; 4                                  | Cell cycle arrest; microtubule function  |
| <u><i>yor043w</i></u> | <i>whi2</i>  | 4                                   | yes                             | 4; 4                                  | DNA repair protein                       |
| Inositol metabolism   |              |                                     |                                 |                                       |                                          |
| <i>yjl153c</i>        | <i>ino1</i>  | 14                                  | yes                             | 4; 4                                  | Inositol biosynthesis                    |
| <i>yol108c</i>        | <i>ino4</i>  | 13                                  | poor                            | 4; 4                                  | Activation phospholipid synthetic genes  |
| <i>ydr017c</i>        | <i>kcs1</i>  | 7                                   | yes                             | 2; 4                                  | Inositol hexaphosphate kinase            |
| <i>ydr497c</i>        | <i>itr1</i>  | 2                                   | yes                             | 4; 4                                  | Myo-inositol permease                    |
| <u><i>yfr019w</i></u> | <i>fab1</i>  | 11                                  | yes                             | 1; 1                                  | PI3P-5-kinase                            |

Glutathione was measured in stationary phase and is expressed as fold relative to the parent. Respiratory capacity was determined by checking growth on YPG medium. Underlined loci denote mutants showing a reduced capacity/inability to utilise 1 mM GSH as a sole nitrogen source. <sup>a</sup>Tolerance to DTT determined after 48 h and 72 h: 1 = no detectable growth; 2 = very poor growth; 3 = poor growth; 4 = minor or no effect relative to the parental strain.

## Supplementary Table 7

### *Mutants affected in Ion homeostasis/transport*

| Locus                   | Common name  | Glutathione excretion (fold parent) | Capacity for respiratory growth | DTT tolerance <sup>a</sup> 48 h; 72 h | Function                                                          |
|-------------------------|--------------|-------------------------------------|---------------------------------|---------------------------------------|-------------------------------------------------------------------|
| Vacuolar ATPase related |              |                                     |                                 |                                       |                                                                   |
| <i>ybr127c</i>          | <i>vma2</i>  | 6                                   | no                              | 1; 1                                  | Required for vacuolar H <sup>+</sup> -ATPase activity             |
| <i>ydr477c</i>          | <i>vma6</i>  | 6                                   | no                              | 1; 1                                  | Required for vacuolar H <sup>+</sup> -ATPase activity             |
| <i>yor332w</i>          | <i>vma4</i>  | 6                                   | no                              | 1; 1                                  | Required for vacuolar H <sup>+</sup> -ATPase activity             |
| <i>ypr036w</i>          | <i>vma13</i> | 2                                   | no                              | 1; 1                                  | Required for vacuolar H <sup>+</sup> -ATPase activity             |
| Calcium related         |              |                                     |                                 |                                       |                                                                   |
| <u><i>ybr036c</i></u>   | <i>csg2</i>  | 2                                   | yes                             | 4; 4                                  | Ca <sup>2+</sup> homeostasis protein (CHP) family                 |
| <u><i>yel031w</i></u>   | <i>cod1</i>  | 3                                   | ND                              | ND                                    | Ca <sup>2+</sup> -ATPase of the ER                                |
| <u><i>ygl167c</i></u>   | <i>pmr1</i>  | 8                                   | poor                            | 1; 3                                  | Ca <sup>2+</sup> , Mn <sup>2+</sup> -transporting ATPase of Golgi |
| <u><i>ygr217w</i></u>   | <i>cch1</i>  | 2                                   | yes                             | 4; 4                                  | Voltage-gated Ca <sup>2+</sup> channel                            |
| <i>yor088w</i>          | <i>yvc1</i>  | 3                                   | yes                             | 4; 4                                  | Ca <sup>2+</sup> -activated vacuolar ion channel                  |
| Other                   |              |                                     |                                 |                                       |                                                                   |
| <i>ydr276c</i>          | <i>pmp3</i>  | 6                                   | yes                             | 4; 4                                  | Plasma membrane proteolipid                                       |
| <i>ydr456w</i>          | <i>nhx1</i>  | 6                                   | yes                             | 4; 4                                  | Endosomal/vacuolar Na <sup>+</sup> /H <sup>+</sup> antiporter     |
| <i>yhl011c</i>          | <i>prs3</i>  | 8                                   | poor                            | 3; 3                                  | Cell cycle regulation; critical cell size                         |
| <i>yjl056c</i>          | <i>zap1</i>  | 5                                   | yes                             | 4; 4                                  | Zn <sup>2+</sup> responsive transcription activator               |
| <i>yjr059w</i>          | <i>ptk2</i>  | 11                                  | yes                             | 4; 4                                  | Stimulates H <sup>+</sup> -pumping via Pma1p                      |
| <i>yjl212c</i>          | <i>hgt1</i>  | 3                                   | yes                             | 4; 4                                  | Glutathione uptake transporter                                    |
| <i>yll010c</i>          | <i>psr1</i>  | 2                                   | yes                             | 4; 4                                  | Na <sup>+</sup> stress response; plasma membrane                  |
| <i>yol001w</i>          | <i>pho80</i> | 4                                   | yes                             | 4; 4                                  | Cyclin interacting with Pho85p                                    |
| <i>ypl058c</i>          | <i>pdr12</i> | 7                                   | no                              | 4; 4                                  | Weak organic acid resistance                                      |

Glutathione was measured in stationary phase and is expressed as fold relative to the parent. Respiratory capacity was determined by checking growth on YPG medium. Underlined loci denote mutants showing a reduced capacity/inability to utilise 1 mM GSH as a sole nitrogen source. <sup>a</sup>Tolerance to DTT determined after 48 h and 72 h: 1 = no detectable growth; 2 = very poor growth; 3 = poor growth; 4 = minor or no effect relative to the parental strain.

## Supplementary Table 8

### *Mutants affected in transcription; chromatin remodelling*

| Locus          | Common name  | Glutathione excretion (fold parent) | Capacity for respiratory growth | DTT tolerance <sup>a</sup> 48 h; 72 h | Function                                  |
|----------------|--------------|-------------------------------------|---------------------------------|---------------------------------------|-------------------------------------------|
| <u>ybr279w</u> | <i>paf1</i>  | 10                                  | poor                            | 1; 4                                  | Protein associated with RNA polymerase II |
| <u>ybr289w</u> | <i>snf5</i>  | 11                                  | No                              | 4; 4                                  | Component of SWI-SNF complex              |
| <u>ydl194w</u> | <i>snf3</i>  | 2                                   | Yes                             | 4; 4                                  | High-affinity glucose sensor              |
| <u>ydr448w</u> | <i>ada2</i>  | 2                                   | Yes                             | 1; 3                                  | Component of SAGA & ADA complexes         |
| <i>yel009c</i> | <i>gcn4</i>  | 2                                   | yes                             | 4; 4                                  | Transcription factor                      |
| <i>ygl025c</i> | <i>pgd1</i>  | 3                                   | yes                             | 4; 4                                  | Component RNA polymerase II holoenz.      |
| <i>ygl115w</i> |              | 2                                   | yes                             | 4; 4                                  | Derepression of glucose-repressed genes   |
| <i>ygl244w</i> | <i>rtf1</i>  | 3                                   | poor                            | 1; 2                                  | Regulation of transcription elongation    |
| <u>ygr252w</u> | <i>gcn5</i>  | 7                                   | poor                            | 2; 4                                  | Component of SAGA & ADA complexes         |
| <i>yhl025w</i> | <i>snf6</i>  | 3                                   | yes                             | 4; 4                                  | Component of SWI-SNF complex              |
| <i>yjl176c</i> | <i>swi3</i>  | 3                                   | yes                             | 4; 4                                  | Component of SWI-SNF complex              |
| <i>yjr063w</i> | <i>rpa12</i> | 7                                   | yes                             | 4; 4                                  | RNA polymerase I subunit                  |
| <u>yjr226w</u> | <i>bur2</i>  | 6                                   | yes                             | 2; 4                                  | Regulation of transcription               |
| <i>yjr357w</i> | <i>rsc2</i>  | 2                                   | yes                             | 2; 4                                  | Component of the abundant RSC complex     |
| <u>yol004w</u> | <i>sin3</i>  | 7                                   | no                              | 1; 2                                  | Component of histone deacetylase B        |
| <u>ypl254w</u> | <i>hfi1</i>  | 5                                   | no                              | 1; 2                                  | Component of the ADA complex              |

Glutathione was measured in stationary phase and is expressed as fold relative to the parent. Respiratory capacity was determined by checking growth on YPG medium. Underlined loci denote mutants showing a reduced capacity/inability to utilise 1 mM GSH as a sole nitrogen source. <sup>a</sup>Tolerance to DTT determined after 48 h and 72 h: 1 = no detectable growth; 2 = very poor growth; 3 = poor growth; 4 = minor or no effect relative to the parental strain.

## Supplementary Table 9

### *Miscellaneous/Ungrouped deletants*

| Locus                 | Common name  | Glutathione excretion (fold parent) | Capacity for respiratory growth | DTT Tolerance <sup>a</sup> 48 h; 72 h | Function                               |
|-----------------------|--------------|-------------------------------------|---------------------------------|---------------------------------------|----------------------------------------|
| <i>ybr041w</i>        | <i>fat1</i>  | 2                                   | yes                             | 4; 4                                  | Very long-chain acyl-CoA synthetase    |
| <i>ybr059c</i>        | <i>akl1</i>  | 3                                   | yes                             | 4; 4                                  | Serine/threonine protein kinase        |
| <u><i>ydr264c</i></u> | <i>akr1</i>  | 5                                   | no                              | 1; 1                                  | Pheromone signaling pathway            |
| <i>yer056c</i>        | <i>fcy2</i>  | 7                                   | no                              | 2; 3                                  | Cytosine/purine permease               |
| <i>yer116c</i>        | <i>slx8</i>  | 5                                   | yes                             | 1; 1                                  | Subunit of Hex3p-Slx8p complex         |
| <i>yhr185c</i>        | <i>pfs1</i>  | 2                                   | yes                             | 4; 4                                  | Prospore membrane formation            |
| <u><i>ynl280c</i></u> | <i>erg24</i> | 4                                   | poor                            | 4; 4                                  | C-14 sterol reductase                  |
| <i>ypl091w</i>        | <i>glr1</i>  | 2                                   | yes                             | 4; 4                                  | Glutathione reductase                  |
| <i>ydl179w</i>        | <i>pcl9</i>  | 2                                   | yes                             | 4; 4                                  | Cyclin that associates with the Pho85p |

Glutathione was measured in stationary phase and is expressed as fold relative to the parent. Respiratory capacity was determined by checking growth on YPG medium. Underlined loci denote mutants showing a reduced capacity/inability to utilise 1 mM GSH as a sole nitrogen source. <sup>a</sup>Tolerance to DTT determined after 48 h and 72 h: 1 = no detectable growth; 2 = very poor growth; 3 = poor growth; 4 = minor or no effect relative to the parental strain.

## Supplementary Table 10

### *Mutations in genes of unknown function*

| Locus          | Common name  | Glutathione excretion (fold parent) | Capacity for respiratory growth | DTT tolerance <sup>a</sup> 48 h; 72 h | Function                                       |
|----------------|--------------|-------------------------------------|---------------------------------|---------------------------------------|------------------------------------------------|
| <u>yal024c</u> | <i>lte1</i>  | 2                                   | poor                            | 2; 3                                  | Required for termination of M phase            |
| <i>ybl100c</i> |              | 8                                   | no                              | 1; 4                                  | Protein of unknown function                    |
| <i>ybr056w</i> |              | 3                                   | yes                             | 4; 4                                  | Protein of unknown function                    |
| <i>ybr162c</i> | <i>tos1</i>  | 2                                   | yes                             | 4; 4                                  | Protein of unknown function                    |
| <i>ybr220c</i> |              | 7                                   | yes                             | 4; 4                                  | Similar to human acetyl CoA transporter        |
| <u>ydl023c</u> |              | 5                                   | yes                             | 4; 4                                  | Protein of unknown function                    |
| <i>ydl039c</i> | <i>prm7</i>  | 6                                   | yes                             | 1; 3                                  | Protein of unknown function                    |
| <i>ydl074c</i> | <i>bre1</i>  | 5                                   | yes                             | 1; 1                                  | Protein of unknown function                    |
| <i>ydr200c</i> |              | 3                                   | yes                             | 4; 4                                  | Protein of unknown function                    |
| <i>ydr475c</i> |              | 3                                   | yes                             | 4; 4                                  | Protein of unknown function                    |
| <i>ydr533c</i> |              | 9                                   | no                              | 4; 4                                  | Protein of unknown function                    |
| <i>yel007w</i> | <i>tos9</i>  | 2                                   | yes                             | 2; 4                                  | Protein of unknown function                    |
| <u>ygl107c</u> |              | 9                                   | yes                             | 4; 4                                  | Protein of unknown function                    |
| <i>ygl127c</i> | <i>soh1</i>  | 3                                   | yes                             | 4; 4                                  | Allows <i>hpr1</i> null mutant to grow at 37°C |
| <i>ygr150c</i> |              | 10                                  | poor                            | 4; 4                                  | Protein of unknown function                    |
| <i>yhl023c</i> |              | 6                                   | yes                             | 1; 3                                  | Protein of unknown function                    |
| <u>yil029c</u> |              | 10                                  | yes                             | 4; 4                                  | Protein of unknown function                    |
| <u>yil041w</u> |              | 13                                  | yes                             | 4; 4                                  | Protein of unknown function                    |
| <u>yil077c</u> |              | 12                                  | yes                             | 4; 4                                  | Protein of unknown function                    |
| <i>yil092w</i> |              | 3                                   | yes                             | 4; 4                                  | Protein of unknown function                    |
| <u>yil097w</u> | <i>fyv10</i> | 2                                   | yes                             | 1; 2                                  | Protein of unknown function                    |
| <u>yil110w</u> |              | 5                                   | yes                             | 4; 4                                  | Protein of unknown function                    |
| <i>ykr035c</i> |              | 12                                  | yes                             | 2; 3                                  | Protein of unknown function                    |
| <i>ylr114c</i> | <i>efr4</i>  | 15                                  | yes                             | 4; 4                                  | Null is synthetically lethal with <i>pho85</i> |
| <i>ylr261c</i> |              | 4                                   | yes                             | 4; 4                                  | Protein of unknown function                    |
| <i>ylr322w</i> |              | 12                                  | yes                             | 4; 4                                  | Protein of unknown function                    |
| <i>yml048w</i> | <i>gsf2</i>  | 2                                   | yes                             | 4; 4                                  | Protein involved in glucose repression         |
| <i>ymr066w</i> | <i>sov1</i>  | 6                                   | no                              | 4; 4                                  | Protein of unknown function                    |
| <u>ymr123w</u> | <i>pkrl</i>  | 4                                   | no                              | 2; 3                                  | Protein of unknown function                    |
| <i>ymr151w</i> | <i>yim2</i>  | 7                                   | ND                              | 4; 4                                  | Protein of unknown function                    |
| <i>ynl215w</i> |              | 3                                   | yes                             | 1; 3                                  | Protein of unknown function                    |
| <i>ynl296w</i> | <i>kre25</i> | 5                                   | poor                            | 4; 4                                  | Questionable ORF; overlaps <i>MON2</i>         |
| <u>yol027c</u> |              | 7                                   | no                              | 4; 4                                  | Protein of unknown function                    |
| <i>yor384w</i> | <i>fre5</i>  | 2                                   | yes                             | 4; 4                                  | Protein with similarity to Fre2p               |
| <i>ypl017c</i> |              | 2                                   | yes                             | 2; 2                                  | Protein with similarity to Lpd1p               |
| <i>ybl009w</i> |              | 6                                   | no                              | 4; 4                                  | Protein of unknown function                    |
| <i>ypr099c</i> |              | 12                                  | yes                             | 4; 4                                  | Protein of unknown function                    |
| <i>yol008w</i> |              | 5                                   | no                              | 4; 4                                  | Protein of unknown function                    |
| <i>yrl193c</i> |              | 11                                  | no                              | 4; 4                                  | Protein of unknown function                    |
| <i>ypr100w</i> |              | 8                                   | yes                             | 4; 4                                  | Protein of unknown function                    |
| <i>ynl183c</i> |              | 3                                   | yes                             | 2; 3                                  | Protein of unknown function                    |
| <i>yol050c</i> |              | 4                                   | yes                             | 4; 4                                  | Protein of unknown function                    |
| <i>yrl257w</i> |              | 4                                   | yes                             | 4; 4                                  | Protein of unknown function                    |

|                            |   |     |      |                                         |
|----------------------------|---|-----|------|-----------------------------------------|
| <i>ydr230w</i>             | 3 | no  | 4; 4 | Protein of unknown function             |
| <i>ydl072c</i>             | 2 | yes | 4; 4 | Protein of unknown function             |
| <i>ydl048c</i> <i>stp4</i> | 2 | yes | 4; 4 | Protein with strong similarity to Stp1p |

---

Glutathione was measured in stationary phase and is expressed as fold relative to the parent. Respiratory capacity was determined by checking growth on YPG medium. Underlined loci denote mutants showing a reduced capacity/inability to utilise 1 mM GSH as a sole nitrogen source. <sup>a</sup>Tolerance to DTT determined after 48 h and 72 h: 1 = no detectable growth; 2 = very poor growth; 3 = poor growth; 4 = minor or no effect relative to the parental strain.

**Supplementary Table 11**

**Extracellular glutathione (GSH and/or GSSG) accumulated by strains of *S. cerevisiae* following growth to stationary phase (72**

**h) under various conditions**

| Locus            | Gene name    | SD medium GSH + GSSG | S.D. | SD medium 2X BCAA | S.D. | SD medium 4X BCAA | S.D. | SD medium pH 6 GSH + GSSG | S.D. | SD medium GSSG | S.D. |
|------------------|--------------|----------------------|------|-------------------|------|-------------------|------|---------------------------|------|----------------|------|
| BY4743           | parent       | 4.6                  | 0.4  | 6.6               | 0.1  | 2.8               | 0.7  | BD                        | 0.20 | 0.89           | 0.05 |
| BY4743           | parent       | 5.2                  | 1.1  | 4.7               | 0.1  | 4.1               | 1.6  | BD                        | 0.02 | 0.85           | 0.07 |
| <i>yal024c</i>   | <i>lte1</i>  | 8.9                  | 0.4  | 13.2              | 1.0  | 10.7              | 4.0  | 8.34                      | 4.16 | 0.70           | 0.05 |
| <i>yal047c</i>   | <i>spc72</i> | 14.1                 | 0.7  | 14.2              | 2.9  | 11.7              | 1.7  | 7.43                      | 8.94 | 1.08           | 0.08 |
| <i>yar002c-a</i> | <i>erp1</i>  | 5.8                  | 0.3  | 5.5               | 0.8  | 4.9               | 1.9  | BD                        | 0.13 | 0.89           | 0.02 |
| <i>ybl007c</i>   |              | 37.0                 | 5.1  | 26.8              | 0.9  | 28.1              | 0.8  | 0.82                      | 0.30 | 3.05           | 0.29 |
| <i>ybl009w</i>   | <i>atp1</i>  | 23.5                 | 2.1  | 21.5              | 0.7  | 11.2              | 2.8  | BD                        | 0.08 | 2.28           | 0.14 |
| <i>ybl027w</i>   |              | 2.9                  | 0.7  | 2.7               | 0.2  | 2.2               | 0.2  | BD                        | 0.10 | 0.66           | 0.06 |
| <i>ybl047c</i>   |              | 3.8                  | 0.7  | 2.9               | 0.2  | 2.6               | 0.4  | BD                        | 0.09 | 0.80           | 0.13 |
| <i>ybl072c</i>   |              | 4.8                  | 1.2  | 3.8               | 0.5  | 2.6               | 0.2  | BD                        | 0.20 | 0.77           | 0.10 |
| <i>ybl091c</i>   |              | 4.7                  | 0.6  | 4.0               | 0.6  | 2.2               | 0.4  | BD                        | 0.05 | 0.67           | 0.07 |
| <i>ybl100c</i>   |              | 21.4                 | 1.0  | 21.9              | 1.4  | 14.9              | 5.5  | BD                        | 0.03 | 1.95           | 0.08 |
| <i>ybr003w</i>   | <i>cox1</i>  | 33                   | 0    | 23                | 3    | 6                 | 2    | BD                        | 0.13 | 3.41           | 0.45 |
| <i>ybr036c</i>   | <i>csg2</i>  | 5.1                  | 0.3  | 4.3               | 0.4  | 3.0               | 0.7  | BD                        | 0.28 | 0.81           | 0.10 |
| <i>ybr037c</i>   | <i>sco1</i>  | 37.3                 | 0.2  | 22.0              | 0.9  | 15.6              | 1.2  | BD                        | 0.08 | 3.76           | 0.33 |
| <i>ybr041w</i>   | <i>fat1</i>  | 8.5                  | 0.0  | 7.8               | 0.1  | 7.2               | 1.5  | BD                        | 0.18 | 0.74           | 0.04 |
| <i>ybr056w</i>   |              | 14.7                 | 1.5  | 16.3              | 0.4  | 21.4              | 5.1  | BD                        | 0.09 | 0.87           | 0.06 |
| <i>ybr059c</i>   | <i>akl1</i>  | 16.4                 | 1.1  | 7.6               | 10.1 | 19.3              | 3.1  | 0.21                      | 0.30 | 1.05           | 0.08 |
| <i>ybr125c</i>   | <i>ptc4</i>  | 12.7                 | 2.0  | 12.0              | 1.8  | 4.1               | 0.5  | BD                        | 0.17 | 1.05           | 0.03 |
| <i>ybr131w</i>   | <i>ccz1</i>  | 1.0                  | 0.0  | 1.1               | 0.2  | -0.9              | 0.2  | BD                        | 0.06 | 0.67           | 0.01 |
| <i>ybr162c</i>   | <i>tos1</i>  | 19.3                 | 5.4  | 21.6              | 0.3  | 13.7              | 7.3  | BD                        | 0.18 | 2.35           | 0.66 |
| <i>ybr163w</i>   | <i>dem1</i>  | 34.2                 | 1.4  | 22.5              | 1.5  | 22.0              | 1.0  | BD                        | 0.12 | 3.47           | 0.07 |

|                |               |      |     |      |     |      |     |       |       |      |      |
|----------------|---------------|------|-----|------|-----|------|-----|-------|-------|------|------|
| <i>ybr279w</i> | <i>pafl</i>   | 24.9 | 0.9 | 19.0 | 0.8 | 16.7 | 2.9 | 8.79  | 1.53  | 1.38 | 0.06 |
| <i>ybr289w</i> | <i>snf5</i>   | 18.5 | 0.9 | 14.0 | 2.1 | 8.8  | 0.4 | 8.15  | 0.63  | 1.05 | 0.04 |
| <i>ycl007c</i> | <i>cwh36</i>  | 14.0 | 2.4 | 12.4 | 1.9 | 10.6 | 0.5 | 0.95  | 0.28  | 1.14 | 0.02 |
| <i>ycl008c</i> | <i>vps23</i>  | 38   | 10  | 14   | 1   | 8    | 2   | 1.52  | 0.56  | 1.99 | 0.66 |
| <i>ycr046c</i> | <i>img1</i>   | 32.8 | 1.0 | 21.0 | 1.4 | 18.8 | 1.9 | BD    | 0.13  | 3.26 | 0.03 |
| <i>ycr063w</i> | <i>bud31</i>  | 11.3 | 0.6 | 14.0 | 0.6 | 7.0  | 1.2 | 3.41  | 0.98  | 0.86 | 0.09 |
| <i>ycr077c</i> | <i>pat1</i>   | 5.4  | 0.1 | 6.7  | 1.9 | 5.3  | 2.6 | 0.07  | 0.40  | 0.80 | 0.01 |
| <i>ycr086w</i> | <i>csm1</i>   | 3.1  | 0.0 | 8.2  | 5.4 | 2.4  | 0.4 | 0.11  | 0.82  | 0.69 | 0.19 |
| <i>ydl023c</i> |               | 42.6 | 0.1 | 25.5 | 4.6 | 24.1 | 2.9 | BD    | 0.05  | 2.12 | 0.00 |
| <i>ydl039c</i> | <i>prm7</i>   | 28.0 | 5.7 | 17.8 | 8.8 | 10.4 | 6.7 | BD    | 0.10  | 2.71 | 0.63 |
| <i>ydl069c</i> | <i>cbs1</i>   | 36.6 | 0.5 | 22.0 | 0.4 | 20.5 | 2.8 | BD    | 0.07  | 3.25 | 0.18 |
| <i>ydl074c</i> | <i>bre1</i>   | 22.5 | 5.8 | 15.7 | 1.0 | 21.1 | 3.6 | 4.12  | 3.44  | 1.77 | 0.64 |
| <i>ydl106c</i> | <i>pho2</i>   | 5.7  | 0.0 | 4.4  | 0.0 | 8.1  | 4.3 | BD    | 0.24  | 0.77 | 0.07 |
| <i>ydl107w</i> | <i>mss2</i>   | 31.7 | 2.4 | 20.4 | 0.6 | 12.4 | 3.4 | BD    | 0.05  | 3.00 | 0.33 |
| <i>ydl179w</i> | <i>pcl9</i>   | 4.3  | 0.6 | 4.4  | 0.8 | 2.1  | 1.0 | BD    | 0.15  | 0.88 | 0.01 |
| <i>ydl191w</i> | <i>rpl35a</i> | 7.4  | 0.7 | 6.9  | 0.8 | 5.2  | 1.0 | BD    | 0.19  | 0.86 | 0.16 |
| <i>ydl202w</i> | <i>mrpl11</i> | 28.4 | 2.2 | 17.1 | 4.2 | 13.4 | 1.1 | BD    | 0.09  | 3.07 | 0.49 |
| <i>ydr017c</i> | <i>kcs1</i>   | 13.4 | 5.0 | 12.3 | 0.8 | 4.6  | 1.2 | BD    | 0.17  | 1.42 | 0.84 |
| <i>ydr027c</i> | <i>luv1</i>   | 32.1 | 1.9 | 31.0 | 1.4 | 34.7 | 2.7 | 0.89  | 0.33  | 1.53 | 0.14 |
| <i>ydr175c</i> | <i>rsm24</i>  | 30.5 | 6.9 | 22.1 | 1.4 | 19.7 | 0.7 | BD    | 0.02  | 3.24 | 0.44 |
| <i>ydr197w</i> | <i>cbs2</i>   | 33.5 | 4.1 | 23.2 | 0.7 | 20.8 | 1.4 | BD    | 0.05  | 3.81 | 1.00 |
| <i>ydr200c</i> |               | 14.2 | 1.9 | 9.8  | 1.1 | 10.0 | 3.0 | 1.16  | 0.57  | 1.08 | 0.13 |
| <i>ydr204w</i> | <i>coq4</i>   | 29.7 | 2.7 | 19.5 | 1.9 | 18.0 | 0.9 | BD    | 0.04  | 3.21 | 0.54 |
| <i>ydr230w</i> |               | 32.4 | 2.1 | 20.2 | 2.7 | 20.9 | 0.8 | BD    | 0.08  | 3.13 | 0.90 |
| <i>ydr264c</i> | <i>akr1</i>   | 18.0 | 0.9 | 12.1 | 4.3 | 19.4 | 3.8 | 10.91 | 10.77 | 1.90 | 1.15 |
| <i>ydr276c</i> | <i>pmp3</i>   | 29   | 6   | 16   | 5   | 7    | 1   | 0.17  | 0.32  | 1.57 | 1.26 |
| <i>ydr298c</i> | <i>atp5</i>   | 34.9 | 1.5 | 23.1 | 3.8 | 19.3 | 0.6 | BD    | 0.02  | 3.22 | 0.44 |
| <i>ydr300c</i> | <i>pro1</i>   | 20.8 | 6.0 | 18.1 | 1.4 | 13.2 | 3.1 | 1.94  | 0.12  | 1.52 | 0.14 |
| <i>ydr322w</i> | <i>mrpl35</i> | 36.7 | 3.8 | 24.8 | 3.9 | 20.3 | 1.5 | BD    | 0.09  | 1.08 | 0.51 |
| <i>ydr323c</i> | <i>pep7</i>   | 30.5 | 1.2 | 35.1 | 4.9 | 25.6 | 5.1 | 4.20  | 1.11  | 1.37 | 0.10 |

|                  |               |      |     |      |     |      |     |      |      |      |      |
|------------------|---------------|------|-----|------|-----|------|-----|------|------|------|------|
| <i>ydr332w</i>   |               | 32.0 | 3.9 | 22.0 | 5.4 | 20.4 | 1.6 | BD   | 0.05 | 1.73 | 1.34 |
| <i>ydr337w</i>   | <i>mrps28</i> | 31.5 | 3.8 | 18.5 | 3.1 | 14.4 | 0.5 | BD   | 0.11 | 2.59 | 1.35 |
| <i>ydr440w</i>   | <i>dot1</i>   | 4.5  | 0.2 | 6.2  | 0.7 | 4.3  | 1.2 | BD   | 0.34 | 0.91 | 0.05 |
| <i>ydr448w</i>   | <i>ada2</i>   | 5.2  | 0.5 | 4.6  | 0.0 | 6.9  | 4.7 | 0.13 | 0.54 | 0.75 | 0.05 |
| <i>ydr462w</i>   | <i>mrpl28</i> | 33.9 | 0.5 | 25.2 | 3.9 | 19.7 | 4.0 | BD   | 0.12 | 3.25 | 0.07 |
| <i>ydr475c</i>   |               | 26.5 | 6.3 | 25.9 | 1.5 | 13.2 | 4.9 | BD   | 0.26 | 3.05 | 0.96 |
| <i>ydr484w</i>   | <i>sac2</i>   | 34.8 | 4.0 | 31.6 | 3.5 | 26.9 | 0.9 | 4.77 | 1.96 | 1.49 | 0.18 |
| <i>ydr486c</i>   | <i>vps60</i>  | 37   | 2   | 28   | 3   | 9    | 7   | BD   | 0.06 | 3.72 | 0.15 |
| <i>ydr495c</i>   | <i>vps3</i>   | 23.1 | 0.7 | 28.1 | 0.1 | 18.3 | 2.2 | 3.91 | 0.81 | 1.27 | 0.10 |
| <i>ydr497c</i>   | <i>itr1</i>   | 5.7  | 0.8 | 6.6  | 0.0 | 5.3  | 2.4 | BD   | 0.18 | 0.84 | 0.06 |
| <i>ydr518w</i>   | <i>eug1</i>   | 36.2 | 1.3 | 26.0 | 4.6 | 21.7 | 3.8 | BD   | 0.02 | 3.08 | 0.00 |
| <i>ydr529c</i>   | <i>qcr7</i>   | 33.3 | 0.4 | 27.2 | 4.4 | 15.1 | 0.6 | BD   | 0.03 | 3.33 | 0.28 |
| <i>ydr533c</i>   |               | 35.9 | 1.1 | 25.2 | 4.7 | 12.4 | 2.2 | BD   | 0.06 | 3.46 | 0.56 |
| <i>yel007w</i>   | <i>tos9</i>   | 13.2 | 1.1 | 14.8 | 3.5 | 10.4 | 1.3 | BD   | 0.13 | 1.05 | 0.21 |
| <i>yel009c</i>   | <i>gcn4</i>   | 6.8  | 1.2 | 7.0  | 1.0 | 3.9  | 1.2 | 1.69 | 1.37 | 0.84 | 0.06 |
| <i>yel051w</i>   | <i>vma8</i>   | 4.6  | 0.5 | 5.2  | 1.0 | 2.7  | 0.9 | BD   | 0.05 | 1.75 | 1.30 |
| <i>yel062w</i>   | <i>npr2</i>   | 35   | 2   | 22   | 5   | 5    | 2   | BD   | 0.04 | 1.37 | 0.91 |
| <i>yer004w</i>   |               | 4.6  | 0.6 | 6.2  | 0.4 | 2.3  | 0.5 | BD   | 0.06 | 0.86 | 0.21 |
| <i>yer005w</i>   | <i>ynd1</i>   | 6.7  | 1.1 | 9.2  | 1.2 | 3.2  | 0.3 | BD   | 0.06 | 0.77 | 0.05 |
| <i>yer017c</i>   | <i>afg3</i>   | 12.9 | 3.7 | 10.8 | 2.7 | 5.8  | 0.8 | BD   | 0.09 | 1.41 | 0.75 |
| <i>yer056c</i>   | <i>fcy2</i>   | 36.2 | 3.2 | 22.5 | 3.5 | 19.2 | 1.0 | BD   | 0.09 | 2.19 | 2.06 |
| <i>yer116c</i>   | <i>slx8</i>   | 15.1 | 3.5 | 21.0 | 0.4 | 23.6 | 6.5 | BD   | 0.10 | 1.45 | 0.01 |
| <i>yer119c-a</i> |               | 5.2  | 0.5 | 6.0  | 0.3 | 4.6  | 1.1 | 2.29 | 1.92 | 0.73 | 0.01 |
| <i>yer122c</i>   | <i>glo3</i>   | 21.6 | 1.1 | 20.7 | 0.4 | 12.5 | 2.4 | BD   | 0.06 | 2.17 | 0.21 |
| <i>yer141w</i>   | <i>cox15</i>  | 35.5 | 1.7 | 21.8 | 2.2 | 19.1 | 3.6 | BD   | 0.10 | 3.60 | 0.42 |
| <i>yer151c</i>   | <i>ubp3</i>   | 6.6  | 0.1 | 7.4  | 0.2 | 3.9  | 1.4 | 0.14 | 0.58 | 0.82 | 0.05 |
| <i>yer153c</i>   | <i>pet122</i> | 34.3 | 1.1 | 25.4 | 4.1 | 22.4 | 5.0 | BD   | 0.05 | 3.21 | 0.06 |
| <i>yer154w</i>   | <i>oxa1</i>   | 30.0 | 1.5 | 23.1 | 1.1 | 10.3 | 1.1 | BD   | 0.06 | 3.05 | 0.10 |
| <i>yfl034w</i>   | <i>mrpl7</i>  | 5.7  | 1.5 | 4.1  | 0.4 | 3.3  | 0.8 | BD   | 0.04 | 0.76 | 0.06 |
| <i>yfr010w</i>   | <i>ubp6</i>   | 20   | 2   | 11   | 2   | 6    | 1   | 0.04 | 0.28 | 1.25 | 0.08 |

|                |              |      |     |      |     |      |      |       |      |      |      |
|----------------|--------------|------|-----|------|-----|------|------|-------|------|------|------|
| <i>yfr019w</i> | <i>fab1</i>  | 7.8  | 0.1 | 8.6  | 0.3 | 4.6  | 0.7  | BD    | 0.19 | 0.94 | 0.03 |
| <i>yfr019w</i> | <i>fab1</i>  | 28.0 | 0.2 | 27.6 | 0.3 | 25.7 | 3.8  | BD    | 0.17 | 2.91 | 0.04 |
| <i>ygl025c</i> | <i>pgd1</i>  | 7.1  | 0.5 | 8.1  | 1.1 | 4.3  | 0.5  | 0.05  | 0.62 | 0.80 | 0.04 |
| <i>ygl066w</i> |              | 10.3 | 1.4 | 10.5 | 0.3 | 7.5  | 0.8  | BD    | 0.22 | 0.86 | 0.03 |
| <i>ygl101w</i> |              | 39.5 | 1.4 | 31.6 | 3.1 | 21.2 | 3.0  | BD    | 0.11 | 3.96 | 0.06 |
| <i>ygl107c</i> |              | 28.5 | 0.5 | 28.0 | 3.1 | 17.8 | 1.8  | BD    | 0.05 | 3.51 | 0.43 |
| <i>ygl115w</i> |              | 9.9  | 0.2 | 11.4 | 0.4 | 6.8  | 0.5  | 0.77  | 0.60 | 0.81 | 0.09 |
| <i>ygl124c</i> | <i>mon1</i>  | 5.8  | 0.3 | 15.8 | 5.7 | 6.1  | 1.0  | 0.25  | 0.13 | 0.99 | 0.06 |
| <i>ygl127c</i> | <i>soh1</i>  | 9.5  | 0.9 | 10.4 | 0.9 | 7.0  | 0.8  | 4.35  | 0.86 | 1.10 | 0.04 |
| <i>ygl167c</i> | <i>pmr1</i>  | 29.7 | 4.0 | 21.3 | 0.3 | 13.7 | 1.0  | 15.34 | 3.51 | 7.11 | 0.40 |
| <i>ygl168w</i> |              | 0.7  | 0.3 | 0.7  | 0.1 | -0.9 | 0.2  | BD    | 0.21 | 0.64 | 0.15 |
| <i>ygl194c</i> | <i>hos2</i>  | 4.2  | 0.5 | 5.1  | 0.4 | 3.1  | 0.6  | BD    | 0.09 | 0.77 | 0.06 |
| <i>ygl223c</i> | <i>tff1</i>  | 8    | 6   | 13   | 4   | 1    | 5    | BD    | 0.20 | 1.11 | 0.53 |
| <i>ygl227w</i> | <i>vid30</i> | 8.7  | 0.2 | 15.7 | 0.5 | 5.2  | 0.6  | BD    | 0.09 | 0.86 | 0.00 |
| <i>ygl237c</i> | <i>hap2</i>  | 10   | 2   | 3.3  | 0.5 | 1.0  | 0.6  | BD    | 0.15 | 0.99 | 0.04 |
| <i>ygl244w</i> | <i>rtf1</i>  | 11.9 | 0.8 | 10.2 | 0.7 | 5.6  | 1.4  | BD    | 0.15 | 0.93 | 0.01 |
| <i>ygl252c</i> | <i>rtg2</i>  | 9.8  | 0.1 | 11.3 | 0.3 | 7.3  | 0.1  | BD    | 0.24 | 0.95 | 0.00 |
| <i>ygr021w</i> |              | 3.9  | 0.2 | 6.0  | 0.5 | 4.9  | 1.4  | BD    | 0.11 | 0.69 | 0.10 |
| <i>ygr123c</i> | <i>ppt1</i>  | 5.1  | 0.4 | 5.5  | 0.8 | 3.0  | 0.1  | BD    | 0.08 | 0.73 | 0.05 |
| <i>ygr150c</i> |              | 35.8 | 3.5 | 24.0 | 4.6 | 18.1 | 0.8  | BD    | 0.53 | 3.88 | 0.82 |
| <i>ygr171c</i> | <i>msm1</i>  | 33.0 | 1.5 | 23.2 | 3.9 | 20.9 | 0.6  | BD    | 0.52 | 2.91 | 0.17 |
| <i>ygr206w</i> |              | 11   | 1   | 8    | 1   | 3    | 1    | 0.08  | 0.92 | 1.13 | 0.20 |
| <i>ygr217w</i> | <i>cch1</i>  | 8.5  | 1.7 | 21.2 | 6.4 | 14.7 | 12.7 | BD    | 0.83 | 3.28 | 3.34 |
| <i>ygr252w</i> | <i>gcn5</i>  | 22.7 | 4.2 | 11.9 | 0.6 | 12.1 | 0.7  | 2.93  | 0.50 | 1.67 | 0.33 |
| <i>ygr257c</i> |              | 24.6 | 1.9 | 16.1 | 1.7 | 9.7  | 2.6  | BD    | 0.15 | 1.84 | 0.10 |
| <i>yhl011c</i> | <i>prs3</i>  | 31.4 | 3.1 | 22.4 | 4.1 | 11.2 | 2.0  | BD    | 0.06 | 3.52 | 0.90 |
| <i>yhl023c</i> |              | 33   | 3   | 20   | 4   | 4.2  | 0.3  | BD    | 0.12 | 1.74 | 1.25 |
| <i>yhl025w</i> | <i>snf6</i>  | 12.6 | 1.0 | 12.4 | 1.4 | 8.3  | 0.8  | 4.63  | 0.15 | 1.06 | 0.06 |
| <i>yhl031c</i> | <i>gos1</i>  | 23.1 | 4.8 | 15.5 | 4.7 | 8.3  | 8.9  | BD    | 0.12 | 3.12 | 0.11 |
| <i>yhl038c</i> | <i>cbp2</i>  | 32.9 | 3.4 | 20.7 | 3.1 | 20.9 | 1.2  | BD    | 0.21 | 2.55 | 1.76 |

|                |               |      |      |      |     |      |     |      |      |      |      |
|----------------|---------------|------|------|------|-----|------|-----|------|------|------|------|
| <i>yhl044w</i> |               | 3.5  | 0.9  | 4.4  | 0.4 | 4.0  | 1.1 | BD   | 0.06 | 0.70 | 0.29 |
| <i>yhr010w</i> | <i>rpi27A</i> | 6.9  | 1.3  | 6.4  | 1.8 | 5.9  | 0.7 | BD   | 0.27 | 1.63 | 1.06 |
| <i>yhr011w</i> | <i>dia4</i>   | 30.8 | 5.4  | 24.7 | 4.0 | 19.6 | 0.7 | BD   | 0.10 | 2.31 | 0.72 |
| <i>yhr030c</i> | <i>mpk1</i>   | 12.1 | 2.9  | 11.9 | 1.4 | 15.1 | 0.2 | 2.95 | 0.89 | 2.16 | 1.31 |
| <i>yhr034c</i> |               | 5.1  | 0.6  | 6.0  | 0.2 | 3.5  | 0.4 | BD   | 0.11 | 1.82 | 1.20 |
| <i>yhr051w</i> | <i>cox6</i>   | 28.8 | 0.2  | 21.0 | 0.7 | 18.3 | 1.7 | BD   | 0.13 | 2.95 | 0.26 |
| <i>yhr116w</i> |               | 25.5 | 15.3 | 10.6 | 3.2 | 14.9 | 1.4 | BD   | 0.18 | 2.57 | 1.42 |
| <i>yhr120w</i> | <i>msh1</i>   | 35.6 | 5.6  | 21.0 | 2.0 | 23.8 | 2.3 | BD   | 0.16 | 3.57 | 0.68 |
| <i>yhr129c</i> | <i>arp1</i>   | 8.5  | 2.1  | 9.7  | 0.5 | 7.3  | 1.3 | BD   | 0.18 | 0.81 | 0.07 |
| <i>yhr147c</i> | <i>mrpl6</i>  | 30.8 | 3.4  | 21.3 | 0.6 | 20.6 | 1.7 | BD   | 0.07 | 3.20 | 0.11 |
| <i>yhr185c</i> | <i>pfs1</i>   | 8.0  | 0.0  | 8.5  | 1.3 | 5.1  | 1.3 | BD   | 0.34 | 0.79 | 0.12 |
| <i>yil001w</i> |               | 5.2  | 0.1  | 7.7  | 0.8 | 6.5  | 0.4 | BD   | 0.68 | 0.80 | 0.11 |
| <i>yil006w</i> |               | 7.4  | 0.5  | 9.5  | 1.7 | 7.2  | 1.2 | BD   | 0.17 | 0.99 | 0.20 |
| <i>yil008w</i> | <i>urm1</i>   | 8.7  | 0.7  | 13.7 | 3.5 | 11.5 | 1.0 | 0.82 | 1.52 | 0.96 | 0.17 |
| <i>yil017c</i> | <i>vid28</i>  | 40.8 | 1.4  | 26.9 | 2.1 | 21.8 | 0.3 | 0.12 | 0.22 | 2.01 | 0.38 |
| <i>yil018w</i> | <i>rpl2B</i>  | 19.7 | 4.3  | 17.8 | 8.1 | 10.7 | 4.6 | BD   | 0.07 | 2.22 | 0.67 |
| <i>yil029c</i> |               | 32.9 | 1.3  | 26.4 | 2.6 | 25.4 | 1.2 | BD   | 0.69 | 1.87 | 0.09 |
| <i>yil041w</i> |               | 35.5 | 4.7  | 26.1 | 2.6 | 22.0 | 0.5 | BD   | 0.09 | 2.17 | 0.08 |
| <i>yil053w</i> | <i>rhr2</i>   | 20.4 | 4.7  | 20.9 | 1.4 | 10.1 | 1.5 | BD   | 0.66 | 1.40 | 0.53 |
| <i>yil065c</i> | <i>fis1</i>   | 34.7 | 7.2  | 25.3 | 2.0 | 19.9 | 1.5 | BD   | 0.07 | 2.65 | 0.24 |
| <i>yil070c</i> | <i>mam33</i>  | 34.0 | 1.6  | 25.3 | 4.0 | 21.1 | 1.7 | BD   | 0.21 | 4.58 | 0.69 |
| <i>yil077c</i> |               | 39.5 | 2.3  | 27.8 | 6.1 | 24.4 | 0.3 | BD   | 0.10 | 1.87 | 1.10 |
| <i>yil092w</i> |               | 8.1  | 0.1  | 11.3 | 0.8 | 10.6 | 1.7 | BD   | 0.17 | 1.03 | 0.02 |
| <i>yil093c</i> | <i>rsm25</i>  | 33.6 | 1.3  | 21.5 | 3.9 | 14.1 | 1.8 | BD   | 0.11 | 3.26 | 0.21 |
| <i>yil097w</i> | <i>fyv10</i>  | 15.9 | 1.2  | 23.4 | 2.7 | 9.7  | 1.8 | 0.28 | 1.15 | 1.30 | 0.39 |
| <i>yil098c</i> | <i>fmc1</i>   | 54.1 | 2.9  | 43.3 | 3.7 | 39.3 | 1.9 | 0.22 | 0.69 | 3.69 | 0.43 |
| <i>yil110w</i> |               | 30.6 | 0.0  | 19.5 | 0.3 | 23.1 | 3.0 | BD   | 0.16 | 1.88 | 0.07 |
| <i>yir017c</i> | <i>met28</i>  | 3.9  | 5.6  | 2.0  | 0.4 | -0.5 | 0.5 | BD   | 0.06 | 0.68 | 0.16 |
| <i>yir021w</i> | <i>mrs1</i>   | 30.7 | 4.6  | 20.8 | 2.0 | 17.1 | 0.3 | BD   | 0.06 | 2.90 | 0.39 |
| <i>yjl004c</i> | <i>sys1</i>   | 8.4  | 0.6  | 9.5  | 1.2 | 6.1  | 0.5 | BD   | 0.40 | 0.90 | 0.04 |

|                |               |      |     |      |     |      |     |       |       |      |      |
|----------------|---------------|------|-----|------|-----|------|-----|-------|-------|------|------|
| <i>yjl022w</i> |               | 34.2 | 0.0 | 24.6 | 4.3 | 23.5 | 2.8 | BD    | 0.02  | 3.01 | 0.04 |
| <i>yjl042w</i> | <i>mhp1</i>   | 29.0 | 1.0 | 26.3 | 0.8 | 25.0 | 2.6 | BD    | 0.05  | 2.99 | 0.17 |
| <i>yjl056c</i> | <i>zap1</i>   | 25   | 7   | 15   | 7   | 5    | 1   | 0.02  | 0.23  | 1.46 | 0.12 |
| <i>yjl063c</i> | <i>mrpl8</i>  | 31.9 | 7.1 | 23.2 | 0.8 | 20.6 | 2.1 | BD    | 0.03  | 2.70 | 0.14 |
| <i>yjl095w</i> | <i>bck1</i>   | 13.2 | 2.4 | 15.5 | 0.6 | 18.0 | 1.1 | 12.84 | 10.39 | 1.20 | 0.09 |
| <i>yjl102w</i> | <i>mef2</i>   | 24.4 | 2.0 | 22.4 | 1.0 | 23.5 | 3.1 | BD    | 0.07  | 1.78 | 2.02 |
| <i>yjl117w</i> | <i>pho86</i>  | 7.2  | 1.5 | 6.3  | 0.4 | 9.8  | 1.2 | 0.41  | 0.67  | 0.87 | 0.03 |
| <i>yjl128c</i> | <i>pbs2</i>   | 4.5  | 0.2 | 5.1  | 0.4 | 3.0  | 0.2 | BD    | 0.06  | 0.77 | 0.03 |
| <i>yjl138c</i> | <i>tif2</i>   | 31.9 | 5.1 | 21.4 | 5.7 | 19.1 | 2.3 | BD    | 0.16  | 3.89 | 0.73 |
| <i>yjl152w</i> | <i>ino1</i>   | 39.9 | 2.9 | 36.6 | 1.4 | 39.4 | 6.2 | 27.42 | 2.52  | 1.51 | 0.18 |
| <i>yjl166w</i> | <i>qcr8</i>   | 29.7 | 3.3 | 22.2 | 0.8 | 19.4 | 1.5 | BD    | 0.16  | 3.03 | 0.42 |
| <i>yjl176c</i> | <i>swi3</i>   | 10.4 | 1.5 | 11.3 | 1.1 | 13.5 | 0.7 | 1.02  | 0.22  | 1.04 | 0.13 |
| <i>yjl183w</i> | <i>mnn11</i>  | 13.6 | 3.1 | 12.1 | 0.5 | 9.8  | 2.1 | 1.95  | 1.22  | 0.96 | 0.04 |
| <i>yjl188c</i> | <i>bud19</i>  | 32   | 6   | 18   | 0   | 8    | 1   | BD    | 0.15  | 2.27 | 0.55 |
| <i>yjl201w</i> | <i>ecm25</i>  | 35.8 | 4.1 | 23.5 | 3.3 | 20.5 | 0.5 | BD    | 0.25  | 4.36 | 0.46 |
| <i>yjl204c</i> | <i>rcy1</i>   | 13.0 | 1.8 | 9.4  | 0.7 | 6.6  | 0.1 | 0.15  | 0.34  | 0.95 | 0.03 |
| <i>yjl209w</i> | <i>cbp1</i>   | 30.9 | 3.6 | 21.1 | 0.3 | 19.0 | 0.9 | BD    | 0.05  | 3.09 | 0.58 |
| <i>yjl212c</i> | <i>opt1</i>   | 6.8  | 0.7 | 7.3  | 1.6 | 5.4  | 0.5 | BD    | 0.16  | 0.92 | 0.03 |
| <i>yjr059w</i> | <i>ptk2</i>   | 32.3 | 4.8 | 23.6 | 3.0 | 19.7 | 1.5 | BD    | 0.22  | 2.10 | 0.62 |
| <i>yjr063w</i> | <i>rpa12</i>  | 31.2 | 3.2 | 23.9 | 1.1 | 20.5 | 1.3 | BD    | 0.18  | 2.02 | 0.45 |
| <i>yjr102c</i> | <i>vps25</i>  | 40   | 8   | 16   | 0   | 9    | 1   | 2.61  | 1.29  | 1.70 | 0.52 |
| <i>yjr144w</i> | <i>mgm101</i> | 34.8 | 1.0 | 22.6 | 0.0 | 23.0 | 0.6 | BD    | 0.18  | 3.25 | 0.22 |
| <i>ykl002w</i> | <i>did4</i>   | 52   | 0   | 28   | 3   | 14   | 1   | 0.82  | 0.45  | 1.92 | 0.13 |
| <i>ykl003c</i> | <i>mrp17</i>  | 53   | 3   | 30   | 4   | 15   | 1   | 0.61  | 0.41  | 1.85 | 0.00 |
| <i>ykl007w</i> | <i>cap1</i>   | 12.8 | 4.1 | 8.4  | 1.9 | 5.4  | 0.4 | BD    | 0.10  | 0.92 | 0.13 |
| <i>ykl032c</i> | <i>ixr1</i>   | 12   | 3   | 10   | 0   | 1.9  | 0.2 | BD    | 0.09  | 1.37 | 0.31 |
| <i>ykl041w</i> | <i>vps24</i>  | 35.5 | 1.3 | 25.3 | 3.3 | 16.0 | 0.7 | 0.25  | 0.20  | 1.40 | 0.09 |
| <i>ykl055c</i> | <i>oar1</i>   | 11.9 | 9.5 | 7.4  | 3.0 | 4.3  | 1.6 | BD    | 0.12  | 2.23 | 1.56 |
| <i>ykl212w</i> | <i>sac1</i>   | 15.6 | 0.5 | 12.6 | 2.7 | 11.8 | 2.0 | 1.62  | 0.48  | 0.99 | 0.10 |
| <i>ykl213c</i> | <i>doa1</i>   | 24   | 5   | 16   | 1   | 7.6  | 0.1 | 1.78  | 0.99  | 1.48 | 0.15 |

|                  |               |      |     |      |     |      |     |       |      |      |      |
|------------------|---------------|------|-----|------|-----|------|-----|-------|------|------|------|
| <i>ykr001c</i>   | <i>vps13</i>  | 22.8 | 3.2 | 22.1 | 1.2 | 25.1 | 1.0 | 1.67  | 1.10 | 1.15 | 0.02 |
| <i>ykr006c</i>   | <i>mrpl13</i> | 29.9 | 2.5 | 20.2 | 2.0 | 17.7 | 2.4 | BD    | 0.38 | 3.11 | 0.34 |
| <i>ykr035c</i>   |               | 24.8 | 8.3 | 13.9 | 1.5 | 11.8 | 5.1 | 2.58  | 1.34 | 1.09 | 0.70 |
| <i>ykr035w-a</i> | <i>did2</i>   | 24   | 9   | 14   | 2   | 7    | 2   | 1.23  | 0.85 | 1.35 | 0.15 |
| <i>ykr054c</i>   | <i>dyn1</i>   | 8.4  | 2.8 | 6.6  | 0.8 | 6.0  | 4.2 | BD    | 0.19 | 0.78 | 0.08 |
| <i>ykr067w</i>   | <i>gpt2</i>   | 4.2  | 1.3 | 3.5  | 0.4 | 2.8  | 0.6 | BD    | 0.14 | 0.65 | 0.11 |
| <i>yll009c</i>   | <i>cox17</i>  | 9.2  | 0.5 | 10.7 | 1.8 | 4.7  | 3.7 | BD    | 0.40 | 0.91 | 0.02 |
| <i>yll010c</i>   | <i>psr1</i>   | 8.2  | 1.1 | 9.5  | 0.7 | 6.1  | 1.4 | BD    | 0.10 | 0.81 | 0.13 |
| <i>yll018c-a</i> | <i>cox19</i>  | 35.6 | 0.6 | 26.3 | 1.1 | 20.7 | 7.9 | BD    | 0.08 | 3.15 | 0.09 |
| <i>yll040c</i>   | <i>vps13</i>  | 9.7  | 1.6 | 10.4 | 3.0 | 6.4  | 0.8 | BD    | 0.44 | 0.87 | 0.09 |
| <i>ylr006c</i>   | <i>ssk1</i>   | 8.6  | 2.2 | 11.1 | 0.6 | 4.4  | 1.3 | BD    | 0.21 | 0.82 | 0.01 |
| <i>ylr018c</i>   | <i>pom34</i>  | 5.1  | 0.9 | 5.8  | 1.3 | 3.0  | 0.8 | BD    | 0.37 | 0.67 | 0.03 |
| <i>ylr025w</i>   | <i>vps32</i>  | 40   | 7   | 19   | 1   | 12   | 2   | 3.52  | 0.88 | 1.92 | 0.20 |
| <i>ylr067c</i>   | <i>pet309</i> | 5.7  | 1.3 | 4.8  | 0.0 | 4.7  | 0.8 | BD    | 0.64 | 0.73 | 0.04 |
| <i>ylr1148w</i>  | <i>pep3</i>   | 50.2 | 0.6 | 48.0 | 2.1 | 50.5 | 2.3 | 13.57 | 1.47 | 1.57 | 0.07 |
| <i>ylr114c</i>   | <i>erf4</i>   | 44.1 | 3.6 | 35.0 | 1.9 | 35.7 | 1.3 | 11.92 | 2.59 | 1.57 | 0.08 |
| <i>ylr119w</i>   | <i>smn2</i>   | 38   | 8   | 10   | 1   | 7    | 1   | 1.81  | 0.59 | 1.65 | 0.32 |
| <i>ylr139c</i>   | <i>sls1</i>   | 5.9  | 0.9 | 5.4  | 0.3 | 3.7  | 0.6 | BD    | 0.06 | 0.66 | 0.03 |
| <i>ylr193c</i>   |               | 32.4 | 5.2 | 21.5 | 2.0 | 19.0 | 2.2 | BD    | 0.08 | 3.08 | 0.58 |
| <i>ylr226w</i>   | <i>bur2</i>   | 14.1 | 2.7 | 9.3  | 3.7 | 14.4 | 2.7 | 12.13 | 2.07 | 1.08 | 0.20 |
| <i>ylr234w</i>   | <i>top3</i>   | 8.5  | 1.5 | 7.9  | 0.9 | 6.9  | 2.5 | 15.16 | 8.54 | 0.93 | 0.10 |
| <i>ylr239c</i>   | <i>lip2</i>   | 9.0  | 1.0 | 10.7 | 0.8 | 6.4  | 1.1 | 0.74  | 0.88 | 0.92 | 0.08 |
| <i>ylr257w</i>   |               | 6.1  | 1.6 | 5.4  | 1.4 | 4.0  | 0.8 | BD    | 0.29 | 0.85 | 0.02 |
| <i>ylr261c</i>   |               | 17.7 | 3.4 | 15.1 | 0.6 | 12.4 | 2.1 | 3.20  | 0.68 | 1.14 | 0.08 |
| <i>ylr262c</i>   | <i>ypt6</i>   | 14.5 | 2.2 | 13.1 | 1.7 | 8.1  | 0.2 | 1.31  | 0.21 | 1.02 | 0.08 |
| <i>ylr295c</i>   | <i>hsp60</i>  | 6.6  | 1.1 | 6.4  | 0.7 | 3.2  | 0.2 | BD    | 0.09 | 0.94 | 0.02 |
| <i>ylr322w</i>   |               | 20.4 | 1.9 | 18.8 | 2.1 | 14.9 | 1.6 | 6.28  | 1.45 | 2.04 | 0.16 |
| <i>ylr324w</i>   |               | 7.6  | 2.2 | 6.5  | 0.6 | 3.1  | 1.8 | BD    | 0.13 | 0.81 | 0.13 |
| <i>ylr330w</i>   | <i>chs5</i>   | 17.9 | 0.9 | 16.1 | 1.3 | 9.5  | 0.7 | BD    | 0.17 | 1.16 | 0.04 |
| <i>ylr342w</i>   | <i>fks1</i>   | 3.3  | 0.9 | 7.2  | 4.4 | 5.3  | 5.8 | BD    | 0.10 | 0.69 | 0.06 |

|                |               |      |      |      |     |      |     |      |      |      |      |
|----------------|---------------|------|------|------|-----|------|-----|------|------|------|------|
| <i>ylr357w</i> | <i>rsc2</i>   | 10.6 | 3.0  | 7.8  | 1.3 | 11.8 | 2.5 | BD   | 0.34 | 1.23 | 0.24 |
| <i>ylr360w</i> | <i>vps38</i>  | 28.0 | 10.1 | 10.4 | 2.3 | 14.0 | 3.8 | 1.67 | 0.48 | 1.42 | 0.48 |
| <i>ylr369w</i> | <i>ssq1</i>   | 13   | 4    | 7.4  | 2.5 | 2    | 2   | BD   | 0.11 | 1.14 | 0.15 |
| <i>ylr396c</i> | <i>vps33</i>  | 23.5 | 5.7  | 30.2 | 5.8 | 41.3 | 6.2 | 5.05 | 0.35 | 1.58 | 0.39 |
| <i>ylr417w</i> | <i>vps36</i>  | 36   | 7    | 15   | 1   | 10   | 1   | 3.15 | 1.30 | 1.59 | 0.29 |
| <i>ylr423c</i> | <i>apg17</i>  | 7.5  | 0.1  | 8.0  | 0.2 | 5.9  | 2.1 | 1.14 | 0.96 | 0.97 | 0.03 |
| <i>ylr439w</i> | <i>mrpl4</i>  | 4.8  | 0.2  | 6.1  | 0.4 | 3.0  | 0.9 | BD   | 0.16 | 0.78 | 0.00 |
| <i>yml048w</i> | <i>gsf2</i>   | 8.3  | 0.5  | 4.9  | 0.4 | 2.7  | 0.3 | BD   | 0.12 | 0.84 |      |
| <i>yml071c</i> | <i>dor1</i>   | 20.0 | 3.6  | 14.1 | 1.5 | 11.8 | 4.4 | 3.41 | 2.30 | 0.95 | 0.32 |
| <i>yml078w</i> | <i>cpr3</i>   | 4.2  | 0.5  | 6.2  | 0.3 | 2.4  | 0.4 | BD   | 0.04 | 0.02 | 1.15 |
| <i>yml097c</i> | <i>vps9</i>   | 6.5  | 0.9  | 7.8  | 1.3 | 9.1  | 0.8 | 0.69 | 0.18 | 0.89 | 0.04 |
| <i>ymr004w</i> | <i>mvp1</i>   | 7.0  | 1.2  | 6.2  | 1.0 | 4.8  | 0.5 | BD   | 0.11 | 0.79 | 0.04 |
| <i>ymr063w</i> | <i>rim9</i>   | 4.9  | 1.1  | 3.3  | 0.5 | 2.4  | 0.8 | BD   | 0.18 | 0.76 | 0.10 |
| <i>ymr064w</i> | <i>aep1</i>   | 33.4 | 6.8  | 21.5 | 0.5 | 24.2 | 3.5 | BD   | 0.08 | 3.08 | 0.93 |
| <i>ymr066w</i> | <i>sov1</i>   | 33.5 | 2.9  | 22.0 | 2.0 | 20.0 | 0.6 | BD   | 0.07 | 3.24 | 0.37 |
| <i>ymr072w</i> | <i>abf2</i>   | 28.5 | 2.7  | 23.0 | 0.7 | 16.8 | 2.7 | BD   | 0.03 | 2.98 | 0.46 |
| <i>ymr077c</i> | <i>vps20</i>  | 35.3 | 4.6  | 15.7 | 1.3 | 12   | 3   | 3.28 | 0.54 | 1.53 | 0.28 |
| <i>ymr123w</i> | <i>pkr1</i>   | 8.3  | 0.4  | 7.5  | 1.1 | 5.3  | 1.3 | 0.02 | 0.21 | 0.92 | 0.08 |
| <i>ymr150c</i> | <i>imp1</i>   | 34.3 | 2.2  | 20.7 | 3.1 | 20.3 | 1.3 | BD   | 0.36 | 3.03 | 0.36 |
| <i>ymr151w</i> | <i>yim2</i>   | 37.1 | 5.3  | 20.4 | 1.4 | 21.0 | 2.5 | BD   | 0.17 | 3.25 | 0.57 |
| <i>ymr193w</i> | <i>mrpl24</i> | 36.7 | 4.3  | 22.1 | 1.2 | 22.0 | 1.6 | BD   | 0.37 | 3.41 | 0.37 |
| <i>ymr228w</i> | <i>mtf1</i>   | 39.5 | 6.2  | 22.7 | 1.2 | 21.9 | 2.8 | BD   | 0.21 | 3.56 | 0.49 |
| <i>ynl080c</i> |               | 19.3 | 3.7  | 11.7 | 2.6 | 16.0 | 2.2 | 1.58 | 0.64 | 1.92 | 0.18 |
| <i>ynl098c</i> | <i>ras2</i>   | 10.9 | 0.2  | 12.5 | 2.2 | 4.8  | 1.2 | BD   | 0.23 | 0.95 | 0.06 |
| <i>ynl106c</i> | <i>inp52</i>  | 5.1  | 0.3  | 4.9  | 0.4 | 2.9  | 0.3 | BD   | 0.16 | 0.84 | 0.02 |
| <i>ynl119w</i> |               | 7.7  | 0.8  | 7.0  | 1.1 | 7.4  | 0.6 | 0.02 | 0.53 | 0.82 | 0.00 |
| <i>ynl148c</i> | <i>alf1</i>   | 6.2  | 1.0  | 7.8  | 0.6 | 2.9  | 0.2 | BD   | 0.12 | 0.84 | 0.05 |
| <i>ynl154c</i> | <i>yck2</i>   | 5.2  | 1.0  | 5.1  | 0.6 | 5.5  | 1.8 | BD   | 0.16 | 2.50 | 2.31 |
| <i>ynl159c</i> | <i>asi2</i>   | 4.8  | 0.7  | 5.2  | 0.9 | 6.6  | 0.7 | BD   | 0.06 | 0.97 | 0.19 |
| <i>ynl177c</i> |               | 27.8 | 1.0  | 24.2 | 2.9 | 18.9 | 0.2 | BD   | 0.21 | 1.66 | 1.01 |

|                |               |      |      |      |     |      |     |       |      |      |      |
|----------------|---------------|------|------|------|-----|------|-----|-------|------|------|------|
| <i>ynl183c</i> |               | 7    | 2    | 2.7  | 0.1 | 1.1  | 0.3 | BD    | 0.09 | 2.01 | 1.66 |
| <i>ynl215w</i> |               | 6.6  | 1.4  | 5.5  | 0.6 | 4.7  | 0.6 | 3.38  | 0.33 | 1.73 | 1.23 |
| <i>ynl225c</i> |               | 10.2 | 1.5  | 8.8  | 1.3 | 7.6  | 1.2 | 1.59  | 0.44 | 0.89 | 0.08 |
| <i>ynl229c</i> | <i>ure2</i>   | 26   | 7    | 2.8  | 0.5 | 1.9  | 0.5 | 2.25  | 0.43 | 1.40 | 0.83 |
| <i>ynl280c</i> | <i>erg24</i>  | 10.4 | 0.6  | 12.1 | 0.1 | 10.1 | 0.8 | 1.79  | 2.11 | 0.74 | 0.03 |
| <i>ynl296w</i> | <i>kre25</i>  | 7.2  | 0.4  | 8.6  | 1.6 | 8.3  | 2.1 | 1.58  | 0.68 | 0.71 | 0.01 |
| <i>ynl297c</i> | <i>mon2</i>   | 23.2 | 3.9  | 19.8 | 5.5 | 18.2 | 2.4 | 3.05  | 1.49 | 1.13 | 0.30 |
| <i>ynr005c</i> |               | 38   | 11   | 12   | 1   | 8    | 1   | 0.66  | 0.51 | 1.85 | 0.64 |
| <i>ynr006w</i> | <i>vps27</i>  | 51.7 | 10.3 | 23.1 | 0.7 | 18.5 | 2.5 | 2.20  | 0.48 | 2.29 | 0.73 |
| <i>ynr036c</i> |               | 23.2 | 2.0  | 23.9 | 2.6 | 21.3 | 1.2 | BD    | 0.08 | 3.22 | 0.15 |
| <i>ynr037c</i> | <i>rsm19</i>  | 34.6 | 6.0  | 22.5 | 2.5 | 16.3 | 1.1 | BD    | 0.10 | 3.57 | 0.86 |
| <i>ynr045w</i> | <i>pet494</i> | 38.5 | 3.2  | 23.4 | 1.8 | 19.7 | 0.9 | BD    | 0.14 | 3.64 | 0.73 |
| <i>ynr050c</i> | <i>lys9</i>   | 3.6  | 0.0  | 5.2  | 0.6 | 4.0  | 0.6 | BD    | 0.22 | 1.25 | 0.02 |
| <i>ynr051c</i> | <i>bre5</i>   | 8.4  | 0.3  | 8.7  | 1.2 | 7.5  | 3.9 | 0.43  | 0.70 | 0.79 | 0.06 |
| <i>yol001w</i> | <i>pho80</i>  | 17.7 | 3.4  | 8.1  | 6.0 | 12.2 | 1.9 | BD    | 0.21 | 2.42 | 1.53 |
| <i>yol004w</i> | <i>sin3</i>   | 37   | 6    | 11   | 1   | 9    | 1   | BD    | 0.16 | 2.25 | 0.10 |
| <i>yol008w</i> |               | 32.0 | 7.3  | 20.0 | 3.3 | 13.9 | 1.1 | BD    | 0.03 | 1.23 | 0.53 |
| <i>yol009c</i> | <i>mdm12</i>  | 24.4 | 2.8  | 16.7 | 3.0 | 13.7 | 2.3 | BD    | 0.21 | 1.98 | 0.16 |
| <i>yol018c</i> | <i>tlg2</i>   | 4.6  | 0.6  | 6.5  | 1.1 | 3.5  | 0.7 | BD    | 0.01 | 2.09 | 1.87 |
| <i>yol027c</i> |               | 30   | 1    | 12   | 1   | 5    | 1   | BD    | 0.17 | 1.85 | 0.97 |
| <i>yol033w</i> | <i>mse1</i>   | 35.1 | 2.6  | 23.9 | 2.5 | 20.9 | 1.2 | BD    | 0.19 | 1.80 | 1.49 |
| <i>yol050c</i> |               | 16   | 1    | 12   | 1   | 3    | 0   | BD    | 0.32 | 2.32 | 1.57 |
| <i>yol081w</i> | <i>ira2</i>   | 18.3 | 2.6  | 18.1 | 0.7 | 16.6 | 2.8 | BD    | 0.57 | 1.25 | 0.10 |
| <i>yol095c</i> | <i>hmi1</i>   | 31.7 | 4.8  | 22.6 | 2.1 | 23.2 | 0.8 | BD    | 0.11 | 3.60 | 0.53 |
| <i>yol108c</i> | <i>ino4</i>   | 14.5 | 3.4  | 14.9 | 1.8 | 16.5 | 0.5 | 21.69 | 1.63 | 1.22 | 0.09 |
| <i>yol138c</i> |               | 34   | 1    | 16   | 1   | 4.8  | 0.4 | BD    | 0.24 | 2.36 | 0.18 |
| <i>yor008c</i> | <i>slg1</i>   | 24.1 | 4.5  | 21.0 | 3.4 | 9.0  | 1.0 | BD    | 0.06 | 2.77 | 0.53 |
| <i>yor026w</i> | <i>bub3</i>   | 10.7 | 0.7  | 9.6  | 1.0 | 11.7 | 2.1 | 1.22  | 0.31 | 0.90 | 0.01 |
| <i>yor036w</i> | <i>pep12</i>  | 34.6 | 1.8  | 37.5 | 5.4 | 28.3 | 1.1 | 3.22  | 0.36 | 1.61 | 0.09 |
| <i>yor043w</i> | <i>whi2</i>   | 30.8 | 1.4  | 27.6 | 2.5 | 21.8 | 1.2 | BD    | 0.04 | 1.84 | 0.05 |

|                |              |      |     |      |     |      |     |       |      |      |      |
|----------------|--------------|------|-----|------|-----|------|-----|-------|------|------|------|
| <i>yor069w</i> | <i>vps5</i>  | 0.9  | 0.0 | 0.9  | 0.2 | -0.8 | 0.1 | BD    | 0.17 | 0.60 | 0.01 |
| <i>yor070c</i> | <i>gyp1</i>  | 18.4 | 2.2 | 19.1 | 0.5 | 17.4 | 0.3 | 2.56  | 0.10 | 0.94 | 0.03 |
| <i>yor088w</i> | <i>yvc1</i>  | 4.5  | 0.5 | 5.3  | 0.3 | 3.9  | 0.8 | BD    | 0.19 | 0.79 | 0.07 |
| <i>yor089c</i> | <i>vps21</i> | 14.0 | 1.0 | 11.6 | 1.2 | 7.4  | 1.1 | 2.25  | 0.10 | 0.84 | 0.50 |
| <i>yor360c</i> | <i>pde2</i>  | 13.9 | 4.0 | 12.5 | 1.9 | 7.8  | 1.0 | BD    | 0.23 | 1.27 | 0.61 |
| <i>yor375c</i> | <i>gdh1</i>  | 12   | 5   | 4    | 0   | 3    | 1   | BD    | 0.18 | 1.46 | 0.43 |
| <i>yor384w</i> | <i>fre5</i>  | 4.6  | 0.4 | 6.8  | 0.9 | 4.7  | 0.6 | BD    | 0.17 | 1.88 | 1.73 |
| <i>ypl003w</i> | <i>vps22</i> | 49.7 | 1.4 | 41.9 | 2.0 | 27.6 | 1.6 | 21.47 | 3.87 | 1.78 | 0.03 |
| <i>ypl017c</i> |              | 5.4  | 0.0 | 6.9  | 0.2 | 4.2  | 1.3 | BD    | 0.29 | 0.81 | 0.06 |
| <i>ypl022w</i> | <i>rad1</i>  | 53.3 | 5.5 | 23.1 | 0.3 | 19.7 | 1.8 | 5.95  | 1.59 | 2.16 | 0.14 |
| <i>ypl026c</i> | <i>sha3</i>  | 10   | 1   | 10   | 0   | 2    | 1   | BD    | 0.05 | 0.99 | 0.09 |
| <i>ypl037c</i> | <i>egd1</i>  | 19.0 | 1.2 | 21.3 | 0.1 | 13.1 | 1.6 | 1.35  | 0.70 | 1.09 | 0.10 |
| <i>ypl058c</i> | <i>pdr12</i> | 34.3 | 5.3 | 19.7 | 0.5 | 15.5 | 4.3 | BD    | 0.21 | 3.19 | 0.75 |
| <i>ypl074w</i> | <i>yta6</i>  | 37.2 | 9.4 | 21.2 | 1.5 | 22.5 | 1.8 | BD    | 0.05 | 3.30 | 0.85 |
| <i>ypl091w</i> | <i>glr1</i>  | 5.5  | 1.6 | 4.8  | 0.2 | 3.3  | 0.7 | BD    | 0.14 | 0.78 | 0.07 |
| <i>ypl132w</i> | <i>cox11</i> | 33.8 | 3.1 | 22.0 | 4.4 | 18.1 | 1.6 | BD    | 0.09 | 3.57 | 0.24 |
| <i>ypl254w</i> | <i>hfi1</i>  | 19.6 | 7.2 | 13.4 | 0.4 | 11.9 | 8.6 | BD    | 0.52 | 0.95 | 0.12 |
| <i>ypl272c</i> |              | 5.4  | 1.1 | 5.1  | 1.0 | 6.0  | 0.3 | BD    | 0.38 | 0.74 | 0.10 |
| <i>ypr004c</i> |              | 34   | 2   | 15   | 1   | 9    | 1   | 2.47  | 0.42 | 1.71 | 0.15 |
| <i>ypr036w</i> | <i>vma13</i> | 14.9 | 2.3 | 14.8 | 2.7 | 11.1 | 1.1 | 0.54  | 0.31 | 0.97 | 0.17 |
| <i>ypr099c</i> |              | 35.7 | 5.3 | 21.3 | 1.7 | 20.1 | 1.3 | BD    | 0.14 | 3.21 | 1.27 |
| <i>ypr100w</i> |              | 38.5 | 4.1 | 21.9 | 0.4 | 21.5 | 2.4 | BD    | 0.19 | 3.67 | 0.59 |
| <i>ypr138c</i> | <i>mep3</i>  | 9    | 3   | 2.8  | 0.5 | 2.6  | 0.5 | BD    | 0.08 | 0.98 | 0.27 |
| <i>ypr166c</i> | <i>mrp2</i>  | 33.2 | 4.0 | 20.2 | 0.6 | 17.8 | 2.0 | BD    | 0.15 | 3.41 | 0.54 |
| <i>ypr173c</i> | <i>vps4</i>  | 45.9 | 2.6 | 30.7 | 0.5 | 19.2 | 0.6 | 2.56  | 1.18 | 1.85 | 0.11 |
| <i>ypr191w</i> | <i>qcr2</i>  | 31.4 | 3.7 | 21.3 | 2.5 | 19.2 | 1.8 | BD    | 0.01 | 3.10 | 0.77 |

All data shown are means  $\pm$  S.D. for triplicate values expressed in  $\mu$ M. All values were obtained following growth of strains in 96-well plates at 30°C without shaking. GSH + GSSG (column 3) = Extracellular total glutathione following growth in SD medium to stationary phase (72 h); 2XBCAA (column 5) = As for GSH + GSSG (column 3) but supplemented with 2-times standard BCAA (see methods section for concentrations used); 4X BCAA (column 7) = As for GSH+ GSSG (column 3) but supplemented with 4-times BCAA (see methods section for concentrations used); GSH + GSSG pH 6.0 (column 9) = As for GSH + GSSG (column 3) but SD medium was buffered to pH 6.0 (25 mM PIPPS); GSSG (column

11) = Extracellular GSSG following growth in SD medium to stationary phase (72 h). Abbreviations: BCAA = branched-chain amino acids; BD = below detection limits.
